# Supplementary material for: Auditory cortex learns to discriminate audiovisual cues through selective multisensory enhancement
Source: eLife. 2025 Apr 22;13:RP102926. doi: 10.7554/eLife.102926 (PMC12014134; doi:10.7554/eLife.102926)
Supplement: Source data 1. — However, some exemplar neuron data were not properly saved in the Excel files. These datasets have been deposited separately in Mendeley Data for accessibility. [file elife-102926-data1.xlsx]

## Sheet:  trained rats under anesthesia
								auditory preference	Permutation test (audi.)	visual preference	Permutation test (visual)	multi. preference	Permutation test (multi)	modality preference (3K-hz)	Permutation test (multi)	modality preference (10K-vt)	Permutation test (multi)
-0.0514069	0.2756	-0.127145	0.0754	0.0410012	0.3258	0.0556894	0.2592	0.160338	0.0366	0.0613807	0.2502	0.0787879	0.182	-0.0514069	0.2756	-0.127145	0.0758
-0.0435536	0.3262	-0.0268987	0.3894	0.169938	0.033	0.382132	0	0.129276	0.0992	-0.0924538	0.1618	0.151704	0.06	-0.0435536	0.3196	-0.0268987	0.3976
0.177966	0.0092	0.151203	0.0166	0.272703	0.0008	0.0788486	0.1472	-0.131446	0.033	0.062486	0.2252	-0.14656	0.0146	0.177966	0.0062	0.0788486	0.1414
0.155807	0.0186	0.251872	0.0006	0.297324	0.0002	0.1875	0.0038	-0.155142	0.0184	0.0544233	0.2522	-0.0550847	0.21	0.155807	0.017	0.1875	0.0056
0.0299389	0.346	0.0869652	0.122	0.229349	0.002	0.0531133	0.238	-0.218331	0.0014	0.0165733	0.4144	-0.154225	0.0144	0.0299389	0.3448	0.0531133	0.2318
0.242637	0.0002	0.199799	0.0006	0.208118	0.0008	0.104036	0.066	0.0147541	0.4184	-0.0541993	0.2396	-0.143008	0.0106	0.208118	0.002	0.104036	0.0698
0.163518	0.0132	0.0981283	0.0946	0.209099	0.0052	-0.042475	0.2838	-0.146051	0.0252	0.00358343	0.4774	-0.244392	0	0.163518	0.0136	-0.042475	0.2866
0.316268	0	0.345722	0	0.354594	0	0.137437	0.0342	-0.14225	0.0206	0.0826428	0.1534	-0.114531	0.0532	0.0162684	0.78	0.137437	0.0298
0.143373	0.0278	0.146992	0.0224	0.285905	0.0002	0.0651596	0.1956	-0.0973174	0.1022	0.141657	0.0428	-0.103128	0.0782	0.143373	0.0262	0.0651596	0.195
0.175396	0.0064	0.0715241	0.1598	0.298127	0	0.092694	0.1026	-0.23696	0.0002	-0.118365	0.0802	-0.325773	0	0.175396	0.0068	0.0715241	0.1476
0.109753	0.0676	0.289906	0	0.199197	0.0038	0.0447434	0.2874	-0.173547	0.0058	0.155879	0.0304	0.0191301	0.4108	0.109753	0.072	0.0447434	0.267
0.149347	0.0212	0.0925802	0.0984	0.163247	0.0178	-0.0241708	0.3806	-0.11073	0.0668	0.0415454	0.3244	-0.157403	0.0126	0.163247	0.0182	-0.0241708	0.3756
-0.0897075	0.1764	-0.0490506	0.3178	0.22458	0.0056	0.417722	0	0.31338	0.0016	0.123105	0.0884	0.333009	0.0004	-0.0897075	0.1784	-0.0490506	0.2942
0.178244	0.0086	0.0584225	0.1972	0.269313	0.0004	0.045995	0.2644	-0.0559613	0.2254	0.0329227	0.3388	-0.17429	0.0082	0.178244	0.0044	0.045995	0.2614
0.157822	0.0122	0.209291	0.001	0.274755	0	0.117725	0.0506	-0.165201	0.0118	0.0179171	0.4164	-0.0873006	0.1014	0.157822	0.0142	0.117725	0.0458
0.189219	0.0062	0.221257	0.0004	0.234612	0.0018	0.127425	0.0502	-0.125186	0.048	0.0257559	0.3798	-0.0856181	0.1202	0.189219	0.0056	0.127425	0.0532
0.116004	0.0612	0.0284759	0.3466	0.118466	0.06	0.087766	0.1212	-0.0555887	0.2318	-0.11243	0.0958	-0.133225	0.0336	0.116004	0.0582	0.0284759	0.3486
0.134899	0.0352	0.0019385	0.4978	0.23372	0.0014	0.0272215	0.3562	0.0243666	0.3756	0.0784994	0.178	-0.110294	0.0674	0.134899	0.0362	0.0019385	0.489
0.103432	0.08	0.0942513	0.093	0.371811	0	0.268382	0.0002	-0.127496	0.0324	-0.101232	0.1086	-0.155783	0.0132	0.103432	0.0808	0.0942513	0.0866
0.169839	0.0114	0.342981	0	0.233452	0.001	0.0993429	0.1016	-0.202683	0.0028	0.135722	0.0502	-0.0434322	0.2636	0.169839	0.011	0.0993429	0.0968
0.114685	0.0616	0.108021	0.0682	0.165299	0.0184	-0.0553817	0.2358	-0.0999255	0.0882	0.115677	0.0876	-0.105184	0.0698	0.114685	0.0622	-0.0553817	0.2312
0.143026	0.0242	0.171324	0.0098	0.222837	0.0016	0.0517835	0.2506	-0.0250373	0.3828	0.156103	0.029	-0.00965852	0.4508	0.143026	0.0186	0.0517835	0.2376
0.116907	0.053	0.234158	0.0002	0.270919	0	0.111546	0.0688	-0.195902	0.004	0.087682	0.152	-0.0801969	0.1312	0.116907	0.0494	0.111546	0.0648
-0.0786566	0.2132	0.143761	0.0738	0.196994	0.0162	0.669602	0	0.43335	0	0.0901216	0.1642	0.583057	0	-0.0786566	0.2028	0.143761	0.074
0.241595	0.0004	0.135027	0.0268	0.0881356	0.124	0.0449781	0.2646	-0.00916542	0.4476	-0.0281075	0.3776	-0.0463609	0.2614	0.0881356	0.1272	0.0449781	0.2656
0.495068	0	0.379947	0	0.152721	0.0258	0.00727472	0.4644	0.0764531	0.1318	0.132027	0.0554	-0.0295364	0.3364	0.152721	0.028	0.00727472	0.4598
0.242714	0.0012	0.254793	0.0004	0.0714174	0.1634	0.207136	0.0034	0.118405	0.05	-0.02486	0.3722	0.0863659	0.111	0.0714174	0.1754	0.207136	0.0044
0.151203	0.0178	0.177966	0.0082	0.0788486	0.1434	0.272703	0.0002	0.131446	0.0424	-0.062486	0.2212	0.14656	0.0154	0.0788486	0.1538	0.177966	0.0058
0.251872	0	0.155807	0.0182	0.1875	0.0048	0.297324	0	0.155142	0.0156	-0.0544233	0.2544	0.0550847	0.2086	0.1875	0.005	0.155807	0.0164
0.0869652	0.1114	0.0299389	0.3532	0.0531133	0.2474	0.229349	0.0028	0.218331	0.002	-0.0165733	0.4202	0.154225	0.0152	0.0531133	0.2474	0.0299389	0.3498
0.199799	0.0014	0.242637	0.0002	0.104036	0.0678	0.208118	0.0012	-0.0147541	0.4236	0.0541993	0.2422	0.143008	0.0102	0.104036	0.0614	0.208118	0.002
0.0981283	0.0864	0.163518	0.0158	-0.042475	0.2802	0.209099	0.0044	0.146051	0.0234	-0.00358343	0.483	0.244392	0	-0.042475	0.2872	0.163518	0.0148
0.345722	0	0.316268	0	0.137437	0.0338	0.354594	0	0.14225	0.0222	-0.0826428	0.1462	0.114531	0.0522	0.137437	0.03	0.316268	0
0.146992	0.0194	0.143373	0.0252	0.0651596	0.197	0.285905	0	0.0973174	0.0978	-0.141657	0.0438	0.103128	0.076	0.0651596	0.1998	0.143373	0.0224
-0.106392	0.1366	0.0264467	0.3912	0.180548	0.0254	0.290772	0.0012	0.00100604	0.4966	0.0106613	0.4602	0.122687	0.0952	-0.106392	0.1342	0.0264467	0.3912
0.0715241	0.148	0.175396	0.0072	0.092694	0.0996	0.298127	0	0.23696	0.0002	0.118365	0.0786	0.325773	0	0.0715241	0.147	0.175396	0.0084
0.289906	0	0.109753	0.0676	0.0447434	0.289	0.199197	0.0044	0.173547	0.0096	-0.155879	0.0314	-0.0191301	0.3904	0.0447434	0.2796	0.109753	0.071
0.0925802	0.0962	0.149347	0.0228	-0.0241708	0.3656	0.163247	0.0152	0.11073	0.0684	-0.0415454	0.3084	0.157403	0.0156	-0.0241708	0.3692	0.163247	0.0176
0.0584225	0.2106	0.178244	0.0062	0.045995	0.274	0.269313	0	0.0559613	0.2186	-0.0329227	0.3368	0.17429	0.0042	0.045995	0.2642	0.178244	0.0076
0.209291	0.001	0.157822	0.0144	0.117725	0.0556	0.274755	0.0002	0.165201	0.0116	-0.0179171	0.4254	0.0873006	0.0928	0.117725	0.0428	0.157822	0.0116
0.221257	0.0008	0.189219	0.0046	0.127425	0.0448	0.234612	0.0012	0.125186	0.044	-0.0257559	0.3792	0.0856181	0.1162	0.127425	0.0456	0.189219	0.0042
0.0284759	0.3606	0.116004	0.0598	0.087766	0.1226	0.118466	0.0646	0.0555887	0.2284	0.11243	0.0884	0.133225	0.0276	0.0284759	0.362	0.116004	0.0562
0.0019385	0.4876	0.134899	0.034	0.0272215	0.3526	0.23372	0.0014	-0.0243666	0.3686	-0.0784994	0.1784	0.110294	0.0588	0.0019385	0.4914	0.134899	0.0348
0.0942513	0.0878	0.103432	0.0744	0.268382	0.0002	0.371811	0	0.127496	0.0376	0.101232	0.1046	0.155783	0.013	0.0942513	0.088	0.103432	0.083
0.342981	0	0.169839	0.01	0.0993429	0.0948	0.233452	0.0006	0.202683	0.0024	-0.135722	0.046	0.0434322	0.2726	0.0993429	0.1	0.169839	0.0106
0.0513543	0.3006	-0.0280289	0.388	0.266667	0.0012	0.619336	0	0.446932	0	0.0233217	0.3956	0.439338	0	0.0513543	0.3046	-0.0280289	0.3892
0.108021	0.068	0.114685	0.061	-0.0553817	0.2322	0.165299	0.0162	0.0999255	0.101	-0.115677	0.0758	0.105184	0.072	-0.0553817	0.2384	0.114685	0.0558
0.171324	0.0094	0.143026	0.0258	0.0517835	0.2494	0.222837	0.0014	0.0250373	0.376	-0.156103	0.031	0.00965852	0.4514	0.0517835	0.2522	0.143026	0.0278
0.234158	0.0002	0.116907	0.0542	0.111546	0.0722	0.270919	0.0002	0.195902	0.0038	-0.087682	0.1326	0.0801969	0.1238	0.111546	0.0662	0.116907	0.054
0.135027	0.0262	0.241595	0	0.0449781	0.2746	0.0881356	0.1374	0.00916542	0.4478	0.0281075	0.374	0.0463609	0.2492	0.0449781	0.2746	0.0881356	0.1434
0.379947	0	0.495068	0	0.00727472	0.4604	0.152721	0.0248	-0.0764531	0.1304	-0.132027	0.0524	0.0295364	0.3366	0.00727472	0.458	0.152721	0.0254
-0.0411466	0.3034	0.0267841	0.3848	-0.023046	0.384	0.18323	0.0222	0.064346	0.2306	-0.0757576	0.1766	0.126917	0.0724	-0.0411466	0.3048	0.0267841	0.3872
0.103399	0.0902	-0.0769373	0.158	0.406484	0	0.342975	0	0.188954	0.0086	0.0366454	0.3096	0.0134183	0.425	0.103399	0.0796	-0.0769373	0.1748
-0.0918863	0.132	-0.0497156	0.2968	0.51319	0	0.306418	0	-0.170886	0.0264	0.0780423	0.147	-0.14535	0.043	-0.0918863	0.1348	-0.0497156	0.2802
0.142609	0.0298	-0.0314238	0.343	0.295957	0	0.292298	0	0.17263	0.015	-0.0097557	0.4552	-0.00652174	0.4632	0.142609	0.0262	-0.0314238	0.341
0.0509709	0.2638	-0.0269675	0.3804	0.0791409	0.1498	-0.0488268	0.2782	0.0105485	0.4332	0.0602453	0.224	-0.068524	0.2102	0.0791409	0.1468	-0.0269675	0.3858
0.0734561	0.223	0.0162749	0.4284	0.32962	0.0002	0.151715	0.0536	-0.103622	0.1596	0.0841246	0.1782	-0.124051	0.1018	0.0734561	0.2244	0.0162749	0.43
0.0506719	0.2534	0.0461624	0.2792	0.348436	0	0.317112	0	-0.0227761	0.3804	-0.0313166	0.3268	-0.0274363	0.3532	0.0506719	0.2442	0.0461624	0.2774
0.069926	0.1978	-0.0339387	0.3586	0.1117	0.0826	-0.0239821	0.4076	-0.0147679	0.43	0.015873	0.4052	-0.117349	0.0892	0.069926	0.2004	-0.0339387	0.3636
-0.0353675	0.3246	0.0935608	0.1668	0.00774738	0.4718	0.0707384	0.2056	-0.0433996	0.3034	-0.0289803	0.3484	0.0288448	0.3708	-0.0353675	0.3222	0.0707384	0.2082
0.298659	0	0.403963	0	0.223203	0.0026	0.10283	0.1368	-0.0504822	0.2844	0.207311	0.0066	0.0481216	0.2854	0.223203	0.0028	0.10283	0.1316
0.156854	0.0318	0.196036	0.0146	-0.117916	0.0692	0.00536398	0.4714	0.0994595	0.1262	0.0204623	0.3916	0.149963	0.039	-0.117916	0.0654	0.00536398	0.478
-0.0191571	0.408	-0.0053266	0.4778	0.600952	0	0.415159	0	-0.327256	0	0.0238949	0.3734	-0.304177	0.0004	-0.0191571	0.4148	-0.0053266	0.4804
0.0182772	0.4088	0.213153	0.0092	-0.212125	0.0044	0.0180843	0.4028	0.0297297	0.3684	-0.0104838	0.4502	0.22382	0.0038	-0.212125	0.0046	0.0180843	0.422
-0.0134387	0.4302	0.126715	0.0538	0.133638	0.0366	0.253384	0.0012	-0.0536657	0.258	-0.0440236	0.2764	0.108321	0.0718	-0.0134387	0.4266	0.126715	0.0566
0.0516996	0.2348	-0.0774008	0.1614	0.136842	0.0372	0.230986	0.0012	0.08739	0.1336	-0.116658	0.058	-0.0398801	0.2976	0.0516996	0.2386	-0.0774008	0.1552
0.178803	0.015	0.193726	0.015	0.181328	0.0122	0.21187	0.0118	0.0337553	0.3494	0.0401635	0.3066	0.0191361	0.4134	0.181328	0.0102	0.193726	0.0198
-0.118527	0.1198	0.0983273	0.1624	0.610964	0	0.485966	0	-0.263078	0.0064	0.157421	0.0468	-0.0821811	0.1852	-0.118527	0.1134	0.0983273	0.1652
-0.0239251	0.3878	0.0254999	0.397	0.183583	0.0092	0.0338164	0.359	-0.0548523	0.2734	0.147787	0.0404	-0.0170255	0.4148	-0.0239251	0.3978	0.0254999	0.3826
0.143071	0.0486	0.145946	0.0554	-0.0197555	0.4184	0.896398	0	0.798559	0	-0.115069	0.0804	0.859026	0	-0.0197555	0.4004	0.145946	0.0622
0.261124	0.001	0.141802	0.0568	0.102482	0.1086	0.914943	0	0.864144	0	0.0622711	0.2348	0.866816	0	0.102482	0.1164	0.141802	0.065
-0.117154	0.0984	0.135856	0.0772	0.207803	0.0068	0.48567	0	0.105225	0.1348	0.0525452	0.2542	0.357753	0	-0.117154	0.0888	0.135856	0.078
0.0165147	0.419	0.0194842	0.4094	0.34715	0	0.230396	0.0042	-0.161316	0.0352	-0.0344303	0.3424	-0.136249	0.06	0.0165147	0.4296	0.0194842	0.4078
0.0953891	0.14	-0.0834034	0.1684	0.349936	0	0.654472	0	0.560444	0	-0.0579993	0.2348	0.420942	0	0.0953891	0.1334	-0.0834034	0.1668
-0.0215352	0.4038	-0.108074	0.1038	0.268896	0.0006	0.515342	0	0.413133	0	0.072119	0.1824	0.295206	0.0002	-0.0215352	0.4002	-0.108074	0.1144
0.117303	0.0838	0.098018	0.146	0.0488949	0.2864	0.141456	0.0586	0.223423	0.009	0.0874068	0.1476	0.188464	0.0158	0.0488949	0.2796	0.141456	0.0594
0.24819	0.0004	0.237432	0.0008	-0.122544	0.0544	-0.190885	0.0058	-0.00137268	0.4944	0.0611215	0.2112	-0.00171573	0.4938	-0.122544	0.0506	-0.190885	0.0046
0.0935178	0.0982	0.0372636	0.3352	0.482304	0	0.511118	0	0.209384	0.0034	0.0436137	0.2838	0.153898	0.021	0.0935178	0.1134	0.0372636	0.317
-0.020585	0.4188	0.0415913	0.3354	0.277277	0.0018	0.357549	0	-0.0196177	0.4314	0.007996	0.4598	0.0560857	0.2684	-0.020585	0.412	0.0415913	0.3312
0.0672659	0.2174	-0.0286486	0.3812	0.126806	0.0652	0.598314	0	0.506126	0	-0.163951	0.0206	0.399551	0	0.0672659	0.2222	-0.0286486	0.3736
0.10543	0.1054	-0.0679843	0.2124	0.512017	0	0.336743	0	0.0529793	0.2752	0.106984	0.0842	-0.124755	0.0754	0.10543	0.1082	-0.0679843	0.2242
0.260808	0.0012	0.214272	0.003	0.125787	0.0536	-0.0434513	0.275	-0.0129261	0.433	0.101495	0.095	-0.0418999	0.2864	0.125787	0.0456	-0.0434513	0.2822
0.0373894	0.3306	-0.186431	0.016	0.360734	0	0.0343562	0.3442	-0.0471661	0.296	0.055284	0.2592	-0.267311	0.001	0.0373894	0.3346	-0.186431	0.0158
0.346061	0	0.271512	0.0006	-0.0715239	0.183	-0.0784071	0.1582	0.0252803	0.3722	-0.0191589	0.3976	-0.03892	0.303	-0.0715239	0.174	-0.0784071	0.164
-0.0647377	0.2232	0.0187833	0.4224	0.121096	0.0688	0.237346	0.0032	0.0237812	0.3996	0.0300858	0.3624	0.117886	0.085	-0.0647377	0.2174	0.0187833	0.4168
0.0902681	0.151	0.163089	0.0404	0.367755	0	-0.106108	0.1126	-0.253315	0.0038	0.259019	0.0006	-0.228507	0.0042	0.0902681	0.136	-0.106108	0.1244
0.166667	0.019	0.141992	0.0616	0.0673728	0.1964	0.0555556	0.2794	0.0901145	0.1418	0.0862193	0.1486	0.0824539	0.1828	0.0673728	0.1968	0.0555556	0.2644
-0.15668	0.0212	-0.0901928	0.1296	0.0350877	0.3064	0.165807	0.0152	0.164809	0.0182	0.115839	0.0658	0.22991	0.0008	-0.15668	0.0156	-0.0901928	0.1222
0.0166798	0.414	-0.122173	0.064	0.605797	0	0.341605	0	-0.196383	0.005	-0.0553369	0.2034	-0.333283	0	0.0166798	0.4172	-0.122173	0.0566
0.103575	0.1394	-0.0599005	0.2708	0.367109	0	0.367089	0.0002	0.176559	0.0398	-0.0244878	0.3996	0.00525803	0.487	0.103575	0.1418	-0.0599005	0.26
0.11454	0.0868	0.121629	0.0904	0.107188	0.0822	-0.0169082	0.4284	-0.0327004	0.3554	0.11051	0.0952	-0.0113972	0.4434	0.107188	0.0858	-0.0169082	0.4394
-0.122605	0.0786	-0.059714	0.246	-0.0665273	0.208	0.148177	0.0396	0.0651341	0.2268	-0.0956881	0.1218	0.12896	0.0646	-0.122605	0.0768	-0.059714	0.2532
0.0841948	0.178	-0.00396396	0.4864	-0.117545	0.0774	0.312031	0	0.471351	0	0.0395352	0.3292	0.458277	0	-0.117545	0.0782	-0.00396396	0.4746
0.00751271	0.4588	0.118694	0.0958	-0.0329509	0.3288	-0.0350242	0.3418	-0.0610307	0.2462	0.0514671	0.2718	0.0471366	0.3054	-0.0329509	0.3462	-0.0350242	0.3542
-0.000790514	0.495	-0.00444939	0.4842	0.248284	0.0002	0.349903	0	0.098827	0.0952	-0.0265617	0.33	0.101349	0.0816	-0.000790514	0.4876	-0.00444939	0.473
0.108775	0.0738	-0.104561	0.0934	0.00602593	0.4742	0.128827	0.0448	0.21437	0.006	-0.109116	0.0748	0.02009	0.3956	0.00602593	0.464	-0.104561	0.0956
0.0815996	0.1632	0.202715	0.0098	0.244288	0.0004	-0.100069	0.1282	-0.227547	0.0028	0.232323	0.0008	-0.114113	0.0958	0.0815996	0.1602	-0.100069	0.122
0.176101	0.044	0.0363636	0.3708	0.336871	0.0018	0.18474	0.043	0.155723	0.068	0.142113	0.1012	0.00411664	0.5004	0.176101	0.0448	0.0363636	0.3638
0.0374843	0.3676	0.32247	0.0012	0.0888365	0.2194	0.278896	0.0042	0.13761	0.093	0.199777	0.036	0.370497	0.0002	0.0374843	0.3586	0.278896	0.003
0.101887	0.1628	0.178388	0.0512	0.404088	0	0.373377	0	0.109686	0.1452	0.197545	0.0408	0.172213	0.0532	0.101887	0.1578	0.178388	0.0542
-0.147996	0.0666	0.2066	0.0214	0.321309	0.0004	0.303981	0.0006	-0.150402	0.0714	0.20673	0.0132	0.201947	0.017	-0.147996	0.0604	0.2066	0.0166
0.294576	0.0038	0.145553	0.0874	0.00392157	0.4846	-0.0236707	0.4082	0.241404	0.0076	0.119786	0.143	0.0769811	0.2414	0.00392157	0.4912	-0.0236707	0.4126
0.147458	0.0866	0.384097	0	-0.0156863	0.454	-0.0277873	0.3958	0.0581114	0.272	0.317291	0.0022	0.317736	0.0022	-0.0156863	0.4322	-0.0277873	0.4032
0.0377358	0.3502	0.207547	0.0292	0.244104	0.0156	0.262987	0.0098	0.144654	0.0782	0.285342	0.004	0.273756	0.0064	0.0377358	0.3624	0.207547	0.0284
-0.0538365	0.2944	0.384906	0	0.282233	0.006	0.57987	0	0.0493082	0.314	0.12872	0.1244	0.493654	0	-0.0538365	0.304	0.384906	0.0004
0.0988679	0.1622	0.268611	0.0068	0.256682	0.0122	0.314935	0.002	0.157233	0.0538	0.268973	0.0104	0.327273	0.0014	0.0988679	0.1608	0.268611	0.0072
0.333082	0	0.320412	0.0028	0.314465	0.0046	0.373701	0.0006	0.167044	0.0506	0.198661	0.0384	0.254202	0.009	0.0144654	0.8018	0.320412	0.0014
-0.105542	0.1494	-0.0859745	0.218	-0.177083	0.0404	-0.219342	0.0274	-0.00431406	0.4802	0.0616319	0.2728	0.0116402	0.4544	-0.177083	0.0366	-0.219342	0.0334
-0.0221861	0.3938	-0.0248945	0.3822	-0.0396192	0.3282	0.0402945	0.3234	0.137131	0.0626	0.0630088	0.2352	0.129545	0.0628	-0.0396192	0.3232	-0.0248945	0.3816
-0.0201517	0.4188	-0.0940325	0.1752	0.28435	0.001	0.164374	0.0336	-0.0160966	0.4408	0.0613027	0.2482	-0.092113	0.1616	-0.0201517	0.426	-0.0940325	0.1708
-0.0888407	0.1866	0.0540235	0.2964	0.050221	0.3002	0.128417	0.0886	-0.140091	0.0864	-0.0724638	0.2224	-0.00272639	0.484	-0.0888407	0.1768	0.0540235	0.2968
-0.108342	0.1294	0.0022604	0.4992	0.0740937	0.2166	0.104201	0.1418	-0.0965795	0.1632	-0.023988	0.4014	0.012074	0.4464	-0.108342	0.1372	0.0022604	0.4926
-0.0728061	0.2254	0.114602	0.1274	0.119187	0.0968	0.116309	0.1128	-0.196932	0.026	0.0178244	0.428	-0.00467381	0.48	-0.0728061	0.2238	0.116309	0.1112
0.101423	0.121	0.189189	0.025	-0.265094	0.0008	0.178544	0.0276	0.318378	0.0002	-0.0324618	0.3556	0.36015	0	-0.265094	0.0006	0.178544	0.0232
0.0497378	0.2972	0.0517117	0.2876	-0.00938387	0.46	0.267433	0.001	0.259279	0.0018	-0.042314	0.3092	0.236704	0.0022	-0.00938387	0.4582	0.0517117	0.2862
0.48015	0	0.283964	0.0012	-0.151994	0.0396	0.142989	0.0532	0.328288	0.0002	-0.167867	0.0224	0.114457	0.103	-0.151994	0.0338	0.142989	0.0524
0.356404	0	0.306486	0.0008	-0.0174096	0.4128	-0.102069	0.1232	0.0572973	0.2664	0.0850069	0.1506	-0.0011985	0.4844	-0.0174096	0.4086	-0.102069	0.1286
0.156854	0.0306	0.196036	0.0152	-0.117916	0.068	0.00536398	0.4722	0.0994595	0.1332	0.0204623	0.3966	0.149963	0.0392	-0.117916	0.0732	0.00536398	0.486
0.150112	0.0466	-0.021982	0.415	-0.031115	0.359	0.174559	0.0254	0.391171	0	0.0372616	0.3376	0.250787	0.0016	-0.031115	0.357	-0.021982	0.4016
-0.0422078	0.319	0.0132208	0.4408	-0.0500614	0.2798	0.225837	0.0046	0.145118	0.0536	-0.10127	0.1186	0.186742	0.0116	-0.0500614	0.2804	0.0132208	0.4402
0.0182772	0.417	0.213153	0.0096	-0.212125	0.0058	0.0180843	0.4254	0.0297297	0.3698	-0.0104838	0.4544	0.22382	0.006	-0.212125	0.0042	0.0180843	0.4284
-0.0702622	0.2134	-0.0715315	0.2336	-0.160761	0.0294	0.132107	0.0734	0.198919	0.0176	-0.106606	0.1044	0.186067	0.0216	-0.160761	0.0298	-0.0715315	0.2248
0.153858	0.0412	0.000900901	0.4908	0.127917	0.0602	0.627893	0	0.713514	0	-0.00934697	0.4562	0.582172	0	0.127917	0.0642	0.000900901	0.4944
0.261124	0.002	0.141802	0.0656	0.102482	0.1152	0.914943	0	0.864144	0	0.0622711	0.2454	0.866816	0	0.102482	0.118	0.141802	0.0654
-0.117154	0.0962	0.135856	0.0756	0.207803	0.0068	0.48567	0	0.105225	0.1274	0.0525452	0.2654	0.357753	0.0002	-0.117154	0.0972	0.135856	0.0664
0.195955	0.015	-0.0969369	0.1496	-0.0141993	0.4312	0.132567	0.071	0.485225	0	0.0625237	0.2382	0.193408	0.0166	-0.0141993	0.4398	-0.0969369	0.1462
-0.0337079	0.3514	-0.0100901	0.4766	-0.139276	0.0492	-0.0217625	0.4042	0.185045	0.023	0.0712391	0.1922	0.20764	0.0106	-0.139276	0.0452	-0.0217625	0.3956
0.051985	0.2802	-0.0304505	0.3586	0.150389	0.0368	0.352797	0	0.245586	0.0036	-0.0266515	0.3698	0.202397	0.011	0.051985	0.2788	-0.0304505	0.366
0.302472	0	0.27982	0.0014	0.0793925	0.1694	0.941762	0	0.937117	0	0.0101048	0.4526	0.942921	0	0.0793925	0.1748	0.27982	0.001
0.0202247	0.41	0.205946	0.019	0.15113	0.0362	0.841379	0	0.672793	0	-0.0819755	0.1666	0.769438	0	0.0202247	0.4048	0.205946	0.013
0.254388	0.0046	0.320298	0.0004	0.148895	0.0532	0.121813	0.101	-0.129024	0.1094	-0.0894553	0.1508	-0.0804284	0.2018	0.148895	0.0488	0.121813	0.0926
0.0970787	0.1416	-0.0888288	0.1698	0.152858	0.0342	0.137011	0.0582	0.151532	0.055	0.00631552	0.4784	-0.0302622	0.36	0.0970787	0.1368	-0.0888288	0.168
0.117303	0.0914	0.098018	0.1358	0.0488949	0.287	0.141456	0.0518	0.223423	0.008	0.0874068	0.1478	0.188464	0.0142	0.0488949	0.2854	0.141456	0.0546
0.145768	0.0586	0.29027	0.0008	0.00851957	0.4592	0.356475	0	0.185225	0.0224	-0.0524188	0.2698	0.288689	0.0008	0.00851957	0.4632	0.29027	0.0018
0.0672659	0.2164	-0.0286486	0.3708	0.126806	0.0604	0.598314	0	0.506126	0	-0.163951	0.0246	0.399551	0	0.0672659	0.2206	-0.0286486	0.3748
0.206142	0.0104	-0.0286486	0.3818	0.171009	0.021	0.938697	0	0.93982	0	-0.056966	0.2432	0.91161	0	0.171009	0.0222	-0.0286486	0.3832
0.0289139	0.37	0.221261	0.0084	-0.0537103	0.263	0.251188	0.0028	0.109189	0.1154	-0.0151573	0.4224	0.307116	0	-0.0537103	0.26	0.221261	0.0082
0.0841948	0.1752	-0.00396396	0.484	-0.117545	0.082	0.312031	0.0002	0.471351	0	0.0395352	0.313	0.458277	0	-0.117545	0.0758	-0.00396396	0.4786
-0.0843446	0.1678	0.136937	0.0694	-0.135819	0.0544	-0.0827586	0.1716	-0.122883	0.0874	0.0284199	0.3626	0.0948315	0.1308	-0.135819	0.0478	-0.0827586	0.1802
0.187566	0.0162	0.0389189	0.333	0.00234597	0.4756	-0.0380077	0.3342	0.232973	0.0034	0.107111	0.1002	0.0654682	0.219	0.00234597	0.4988	-0.0380077	0.331
0.272328	0.0008	0.299002	0	0.00867824	0.453	-0.0581416	0.217	-0.0362617	0.3122	0.0807477	0.1468	0.0127325	0.4254	0.00867824	0.4532	-0.0581416	0.2152
-0.0654388	0.2642	0.00384268	0.4832	0.120071	0.0986	0.340855	0.0002	-0.0895372	0.1918	-0.156922	0.0358	-0.0375852	0.3408	-0.0654388	0.2464	0.00384268	0.4924
-0.0286385	0.3892	0.00805749	0.483	-0.164943	0.0398	0.217568	0.012	0.310614	0.001	0.0248209	0.4052	0.37378	0	-0.164943	0.0404	0.00805749	0.4644
-0.187793	0.0312	0.272866	0.0034	-0.164368	0.0378	0.25433	0.0046	0.0731891	0.2342	0.0501416	0.3056	0.47439	0	-0.187793	0.0272	0.25433	0.0022
-0.0544601	0.2872	0.0659843	0.2434	-0.00727969	0.4696	0.0894309	0.1684	0.173541	0.0404	0.121606	0.0946	0.198374	0.0202	-0.00727969	0.476	0.0659843	0.253
0.350121	0	0.215967	0.0026	-0.0206943	0.394	-0.10823	0.0788	-0.0221917	0.3832	-0.0521495	0.2536	-0.154055	0.0228	-0.0206943	0.387	-0.10823	0.0802
0.00892019	0.4702	0.138284	0.0816	-0.064751	0.2418	0.360728	0	0.235412	0.0076	-0.12727	0.0792	0.312195	0.0006	-0.064751	0.2554	0.138284	0.0792
0.0122066	0.4584	0.17378	0.0342	-0.110153	0.1256	0.232945	0.0062	0.208753	0.0192	0.0629685	0.2456	0.378455	0	-0.110153	0.1252	0.17378	0.0386
-0.0262911	0.3954	0.145688	0.0732	0.174713	0.0304	0.554083	0	0.2334	0.0104	-0.00916209	0.4654	0.362195	0	-0.0262911	0.4044	0.145688	0.0706
0.166197	0.0494	0.0119774	0.4422	0.122989	0.101	0.712619	0	0.734155	0	0.061969	0.2382	0.649593	0	0.122989	0.0938	0.0119774	0.4516
0.0169014	0.4318	0.163545	0.05	0.047318	0.3196	0.884765	0	0.75327	0	-0.183575	0.0186	0.839431	0	0.0169014	0.438	0.163545	0.0526
0.191549	0.0266	0.0609756	0.2734	0.322797	0.0002	0.448038	0	0.360664	0	0.115609	0.1136	0.223171	0.013	0.191549	0.0288	0.0609756	0.2716
0.0494041	0.2934	-0.04566	0.3134	0.343413	0	0.150981	0.0576	-0.0248994	0.3918	0.116942	0.1038	-0.121519	0.0994	0.0494041	0.3148	-0.04566	0.3246
0.121831	0.1082	0.087108	0.1882	0.0812261	0.2042	0.398727	0	0.29326	0.003	-0.0623022	0.2512	0.378862	0	0.0812261	0.2026	0.087108	0.186
0.24819	0.0008	0.237432	0.0002	-0.122544	0.0586	-0.190885	0.0062	-0.00137268	0.4996	0.0611215	0.2154	-0.00171573	0.5002	-0.122544	0.0512	-0.190885	0.004
-0.179577	0.0384	-0.135017	0.0838	-0.197701	0.0228	0.165253	0.0356	0.399648	0	0.0869565	0.1692	0.445935	0	-0.197701	0.0192	-0.135017	0.0904
0.260808	0.0004	0.214272	0.0026	0.125787	0.0466	-0.0434513	0.2782	-0.0129261	0.4308	0.101495	0.0932	-0.0418999	0.2948	0.125787	0.0506	-0.0434513	0.2714
-0.00586854	0.4724	0.0483449	0.3106	-0.104406	0.1528	0.312831	0.0012	0.381288	0.0004	0.0326503	0.3626	0.461789	0	-0.104406	0.1268	0.0483449	0.3142
0.346061	0	0.271512	0	-0.0715239	0.1764	-0.0784071	0.1516	0.0252803	0.375	-0.0191589	0.403	-0.03892	0.3192	-0.0715239	0.1766	-0.0784071	0.1574
0.368005	0	0.399642	0	-0.0658974	0.1948	-0.050885	0.2458	0.107756	0.0914	0.141028	0.0308	0.164439	0.0148	-0.0658974	0.1886	-0.050885	0.2532
0.0147493	0.4338	0.0364177	0.325	0.183196	0.0084	0.257081	0.0004	0.0280877	0.3564	-0.00567169	0.469	0.0520362	0.2424	0.0147493	0.4194	0.0364177	0.3246
0.120076	0.0572	0.0919361	0.1042	0.308135	0	0.442014	0	0.0817237	0.1382	-0.0657106	0.1942	0.0687112	0.188	0.120076	0.0604	0.0919361	0.1208
0.0269825	0.3588	0.245262	0	0.131907	0.042	0.419558	0	-0.0818007	0.1348	-0.157025	0.0172	0.0835428	0.1486	0.0269825	0.365	0.245262	0
-0.0442037	0.314	-0.0578662	0.2858	0.215915	0.0104	0.107503	0.1236	-0.0251509	0.3992	0.0444778	0.3272	-0.0510224	0.2948	-0.0442037	0.3282	-0.0578662	0.283
0.0813812	0.1478	0.0294314	0.35	0.187895	0.0072	0.261941	0.0004	0.0701808	0.1854	-0.0617404	0.2142	0.0247193	0.365	0.0813812	0.1484	0.0294314	0.345
-0.0330557	0.3376	0.0981048	0.0966	0.31332	0.0002	0.387381	0	-0.0854944	0.1336	-0.0628747	0.2004	0.0476789	0.2692	-0.0330557	0.3426	0.0981048	0.0926
0.0218636	0.3898	0.0350056	0.3178	0.246313	0.001	0.12544	0.0506	-0.0495575	0.256	0.115054	0.0678	-0.0392995	0.3132	0.0218636	0.3846	0.0350056	0.3272
0.156863	0.0186	0.0836864	0.1398	0.265516	0.0004	0.374141	0	0.0879569	0.1134	-0.133204	0.0344	0.0100553	0.447	0.156863	0.0206	0.0836864	0.1288
0.107756	0.0864	0.0301003	0.3534	0.238373	0.0002	0.247277	0.0004	0.0500192	0.242	-0.0564738	0.228	-0.0296631	0.3428	0.107756	0.0714	0.0301003	0.3372
-0.0521886	0.2548	-0.0560535	0.2272	0.124849	0.0468	0.145127	0.0264	0.0568897	0.235	0.0204559	0.4024	0.0459795	0.2776	-0.0521886	0.2448	-0.0560535	0.2286
-0.0223285	0.3976	0.00117925	0.486	0.178842	0.0064	0.323305	0	0.072327	0.1702	-0.0471946	0.2364	0.0855994	0.125	-0.0223285	0.3872	0.00117925	0.4996
0.173844	0.0114	-0.00754717	0.4686	0.183303	0.007	0.111441	0.069	0.183057	0.009	0.0671391	0.1842	0.00584795	0.4708	0.183303	0.008	-0.00754717	0.4662
0.066454	0.1936	0.148742	0.0268	0.180505	0.0066	0.182839	0.0066	-0.0984372	0.1094	0.00189947	0.4774	0.00657895	0.4614	0.066454	0.1904	0.148742	0.0258
-0.16073	0.0196	-0.0459906	0.27	0.0859044	0.117	0.0451271	0.2766	-0.0696589	0.1884	0.0639246	0.1954	0.0349415	0.3236	-0.16073	0.0178	-0.0459906	0.2754
-0.047454	0.3194	0.0544756	0.2924	0.36145	0	0.407265	0	-0.0704225	0.2394	-0.0629685	0.251	0.0317429	0.375	-0.047454	0.3096	0.0544756	0.2872
-0.0244551	0.3786	0.0470912	0.266	0.0772081	0.1462	0.139689	0.0302	-0.00076234	0.4906	0.00423729	0.471	0.0701754	0.165	-0.0244551	0.3836	0.0470912	0.2586
0.0994152	0.1014	0.0796384	0.1378	0.0679825	0.1836	0.19089	0.0054	0.0971984	0.111	-0.0485096	0.2536	0.0807749	0.144	0.0679825	0.1768	0.0796384	0.1444
0.00318979	0.4696	0.0463836	0.2506	0.0612523	0.1778	0.148305	0.0104	-0.0189632	0.4044	-0.0545003	0.1922	0.0233187	0.3782	0.00318979	0.487	0.0463836	0.2534
-0.0407585	0.31	0.00951258	0.444	0.0991379	0.0902	0.135028	0.0344	-0.015628	0.416	-0.012931	0.4288	0.0358918	0.3202	-0.0407585	0.3034	0.00951258	0.4532
0.000560433	0.498	-0.0208885	0.3966	0.0170792	0.4132	0.307241	0.0002	0.320183	0	0.00251736	0.4848	0.300682	0	0.000560433	0.4778	-0.0208885	0.4118
-0.0966748	0.1144	-0.060508	0.2242	0.108168	0.0764	0.499899	0	0.390985	0	0.078125	0.1566	0.460925	0	-0.0966748	0.1056	-0.060508	0.225
0.0936858	0.1218	-0.124546	0.0608	-0.0531353	0.25	0.336671	0	0.516771	0	-0.0162326	0.4108	0.388638	0	-0.0531353	0.2426	-0.124546	0.0588
0.0857463	0.137	0.105815	0.0894	-0.010066	0.4468	0.294903	0.0002	0.253573	0.001	-0.0635417	0.207	0.247909	0.0004	-0.010066	0.434	0.105815	0.0922
0.0328822	0.3402	0.0194936	0.393	0.020003	0.3892	0.103482	0.0856	0.124274	0.0566	0.0539064	0.224	0.156955	0.0216	0.0328822	0.3418	0.0194936	0.4082
-0.0160658	0.4052	0.0623713	0.2178	0.181188	0.0062	0.124393	0.0532	-0.0426911	0.2938	0.0837674	0.141	0.0337403	0.3254	-0.0160658	0.4214	0.0623713	0.209
-0.15948	0.0508	0.0953888	0.171	-0.016092	0.4382	0.326362	0	-0.0470322	0.3198	-0.138764	0.0668	0.193379	0.0208	-0.15948	0.05	0.0953888	0.1758
0.0662245	0.194	-0.0738452	0.1814	0.289109	0	0.227549	0.0036	0.128645	0.0482	0.0901042	0.1124	0.00557531	0.4764	0.0662245	0.1862	-0.0738452	0.1914
-0.130768	0.0492	0.0397176	0.3126	0.228548	0.002	0.203782	0.0044	-0.0708977	0.1764	0.133767	0.039	0.137268	0.0378	-0.130768	0.0492	0.0397176	0.2956
0.036148	0.3268	-0.105619	0.0886	0.223185	0.0016	0.168993	0.0146	0.0823328	0.1442	-0.0155382	0.4202	-0.0261463	0.3716	0.036148	0.3358	-0.105619	0.089
0.152718	0.029	0.0189271	0.3978	0.393482	0	0.190433	0.009	-0.0594626	0.2168	0.0827257	0.1422	-0.139575	0.0394	0.152718	0.0224	0.0189271	0.4062
0.0500654	0.2756	-0.0880651	0.141	0.275413	0.0002	0.283677	0.0004	0.120831	0.0706	0.00642361	0.4672	-0.0108623	0.439	0.0500654	0.2568	-0.0880651	0.1332
-0.0467028	0.287	-0.056193	0.2354	0.206931	0.0026	0.262237	0.0012	0.179912	0.0126	0.0804688	0.1482	0.123426	0.0544	-0.0467028	0.2808	-0.056193	0.2292
-0.071175	0.1786	-0.0542316	0.2532	0.182343	0.009	0.169296	0.018	0.0904326	0.124	0.124566	0.0558	0.119485	0.0678	-0.071175	0.1912	-0.0542316	0.2566
0.0461424	0.2804	-0.0127488	0.434	0.366172	0	0.213592	0.0028	0.0389747	0.3016	0.136806	0.0294	-0.0204749	0.4002	0.0461424	0.2746	-0.0127488	0.4356
-0.0295162	0.3518	-0.0353045	0.3246	0.258746	0.0004	0.0990089	0.1096	-0.124071	0.0544	0.0532986	0.2398	-0.110833	0.0832	-0.0295162	0.3576	-0.0353045	0.3128
0.254793	0.0002	0.242714	0	0.207136	0.0038	0.0714174	0.1634	-0.118405	0.0532	0.02486	0.3824	-0.0863659	0.116	0.207136	0.0036	0.0714174	0.1674
							Mean	0.105569		0.0215255		0.118839		0.0182691		0.0437845
							STD	0.230041		0.0951669		0.231879		0.101741		0.108226
							SEM	0.0164315		0.00679763		0.0165628		0.00726723		0.00773044

## Sheet: behavioral data for mean RT
	A	V	AV
Rat1	0.4141	0.389202	0.363645
Rat2	0.487421	0.397579	0.387298
Rat3	0.423933	0.417038	0.358455
Rat4	0.401267	0.351922	0.304131
Rat5	0.397024	0.360512	0.346642
Rat6	0.377031	0.467106	0.37005
Rat7	0.556871	0.509735	0.471593
Rat8	0.379273	0.378085	0.319518
Rat9	0.458312	0.482061	0.409209
Rat10	0.363552	0.42014	0.342035

## Sheet: behavioral performance data
	A3k
	81.87	78.8	81	70.22	88.46	86.7
	80.39	76.7	70.3	71.88	93.75	96.94
	83.67	94.7	86.21	86.47	96.85	99.19
	86.44	83.18	89.53	78.9	92.19	97.87
	85.63	95.63	71.17	77.64	96.09	96
	76.5	75.69	71.58	75.77	83.82	80.42
	81.02	77.14	78.75	75.89	85.03	82.64
	87.9	81.88	69.77	71.53	96.09	91.45
	69.88	77.78	71.12	72.16	85.37	89.83
	91.06	95.1	74.4	70.4	96.75	97.08

## Sheet: exemplar rat RT data
AV trials	A trials	V trials
0.481455	0.710545	0.766182
0.684727	0.493091	0.959273
0.386909	0.598182	0.243636
0.587636	0.577818	0.286545
0.458545	0.400727	0.651636
0.569818	0.814545	0.455636
0.364	0.518182	0.668727
0.415636	0.350182	0.346545
0.745091	0.458545	0.673091
0.493455	0.522909	0.533818
0.454909	0.602909	0.383636
0.499636	0.740727	0.457091
0.285818	0.375273	0.238545
0.623636	0.728364	0.448
0.502545	0.658909	1.05491
0.760727	0.449091	0.404727
0.502909	0.361091	0.231273
0.625091	0.710545	0.475273
0.295636	0.322545	0.618909
0.346545	0.672	0.965455
0.459273	0.460364	0.330909
0.353818	0.799273	0.590909
0.428727	0.528727	0.478182
0.415636	0.392727	0.473455
0.414182	0.886545	0.652364
0.12	0.498909	0.917455
0.392727	0.620727	0.638545
0.4	0.544364	0.716364
0.310182	0.722182	1.05855
0.444364	0.536364	1.02727
0.326909	0.434909	0.478182
0.534182	0.641455	0.500364
0.308364	0.620364	0.287273
0.396364	0.434909	0.268727
0.278909	0.445818	0.794909
0.523273	0.544	0.261091
0.282909	0.675273	0.386909
0.347636	1.04327	0.315636
0.570545	0.662909	0.486182
0.361455	0.406909	0.680727
0.557091	0.8	0.325091
0.252	0.316364	0.253818
0.210909	0.760727	0.602545
0.321818	0.476	0.967273
0.271636	0.894909	0.808727
0.424727	0.607273	0.330182
0.461091	0.550545	0.612364
0.457818	0.587273	0.42
0.482909	0.348727	0.378545
0.269818	0.341818	0.686182
0.715273	0.433818	0.424364
0.524727	0.534545	0.331273
0.449818	0.978909	0.990545
0.381091	0.455636	0.490909
0.531636	0.793818	0.125455
0.387636	0.332727	0.512727
0.342545	0.323273	0.379636
0.383273	0.510909	0.638909
0.385455	0.440364	0.630545
0.500727	0.838909	0.453455
0.326909	0.579636	0.444364
0.681818	0.672364	0.330545
0.363636	0.858182	0.198909
0.423636	0.64	0.360727
0.587636	0.652364	0.373091
0.344364	0.702182	0.422909
0.292	0.403636	0.243273
0.425818	0.366909	0.416364
0.389818	0.347273	0.250182
0.508727	0.848	0.777455
0.485818	0.339273	0.495636
0.379273	0.474182	0.548364
0.442182	0.301818	0.618182
0.565091	0.576	0.337091
0.735636	0.958182	0.529455
0.408727	0.677455	0.443273
0.307636	1.05418	0.295273
0.976727	0.372364	0.218182
0.331273	0.671273	0.396364
0.538182	0.569091	0.511636
0.538182	0.337455	0.335636
0.448	0.348727	0.541455
0.421455	0.599636	0.626182
1.03782	0.593818	0.312
0.368	0.393455	0.908364
0.393455	0.892	1.10473
0.429455	0.466182	0.380727
0.424727	0.596727	0.349455
0.565091	0.48	0.504
0.367636	0.539636	0.114909
0.622182	0.702182	0.496
0.466182	0.837455	0.365818
0.316364	0.370545	0.776364
0.331636	0.483273	0.809091
0.286909	0.242182	0.395636
0.329455	0.311636	0.448364
0.410182	0.346909	0.376727
0.290909	0.337455	0.279273
0.405091	0.365091	0.712364
0.357455	0.433818	0.388
0.414909	0.416	0.592
0.314545	0.418545	0.478545
0.486545	1.05855	0.501455
0.440364	0.437818	0.425455
0.456	0.798182	0.533455
0.618545	0.444	0.377818
0.478545	0.616	0.598182
0.868727	0.331273	0.353091
0.569091	0.357091	0.547273
0.749455	0.827273	0.416364
0.964	0.466909	0.760727
0.695636	0.447636	0.256364
0.689818	0.449818	0.632364
0.570909	0.378909	0.297091
0.902909	0.536364	0.654909
0.709455	0.336727	0.223273
0.462182	0.397455	0.344
0.870909	0.514909	0.502545
0.530182	0.755636	0.219636
0.770545	0.34	0.370545
0.414182	0.648364	0.607636
0.447273	0.576727	0.556
0.489818	0.661818	0.608364
0.410182	0.272727	0.866545
0.347636	0.438182	0.232727
0.357091	0.566909	0.280727
0.349091	0.276364	0.830545
0.430545	0.373818	0.631636
0.457818	0.662909	0.264364
0.762909	0.771273	0.222545
0.289091	0.332	0.223273
0.287273	0.747636	0.346545
0.385455	0.501818	0.767273
0.58	0.210909	0.326545
0.732364	0.346909	0.150182
0.486909	0.434182	0.718909
0.336364	0.439636	0.361455
0.405091	0.432	0.884727
0.380364	0.811273	0.221818
0.358909	0.219273
0.708727	0.275636
0.326545	0.506909
0.363636	0.74
0.585091	0.378909
0.252	0.402545
0.326545	0.517091
0.461091	0.386545
0.246909	0.417091
0.454545	0.575636
0.517818	0.319273
0.591636	0.456
0.416727	0.318909
0.210909	0.385091
0.305455	1.09818
0.280364	0.540727
0.7	0.686545
0.657818	0.559636
0.264	0.358545
0.370909	0.888364
0.300364	0.290545
0.342909	0.413091
0.401818	0.287636
0.278182	0.234182
0.353818	0.561455
0.270909	0.654545
0.32	0.317091
0.660727	0.262909
0.278182	0.247636
0.414545	0.472727
0.561818	0.496364
0.349818	0.375273
0.389091	0.670545
0.822182	0.376
0.261455	0.625091
0.422545	0.570909
0.793818	0.498909
0.254545	0.443273
0.28	0.258182
0.322909	0.318909
0.292364	1.14873
0.517818	0.34
0.565091	0.713091
0.233455	0.3
0.225455	0.663636
0.284364	0.353091
0.536727	0.590909
0.723273	0.288727
0.334545	0.496727
0.589455	0.759273
0.542182	0.341818
0.257091	0.365091
0.366545	0.296727
0.491636	0.344
0.571636	0.469455
0.253818	0.409818
0.376727	0.828
0.111636	0.579273
0.343273	0.426545
0.277455	0.481091
0.217455	0.563636
0.542182	0.262182
0.549455	0.422909
0.397455	0.770545
0.248	0.779636
0.306182	0.334545
0.541455	0.275636
0.213455	0.313818
0.396364	0.256364
0.465455	0.166909
0.262545	0.541091
0.350182	0.365091
0.442545	0.310545
0.258909	0.261091
0.273091	0.344
0.348727	0.491636
0.365455	0.280727
0.259273	0.269091
0.309455	0.279273
0.266909	0.118545
0.432	0.368364
0.256727	0.346545
0.561091	0.464727
0.232	0.380364
0.358545
0.353455
0.818909
0.538182
0.371636
1.04036
0.307273
0.591273
0.429091
0.752
0.417091
0.290182
0.64
0.304
0.321818
0.212727
0.567273
0.315273
0.497091
0.280727
0.387273
0.410909
0.295273
0.234909
0.335273
0.508727

## Sheet: cue selectivity in trained rats
auditory selectivity	permutation test	vsiual selectivity	permutation test	multi. selectivity	permutation test
-0.631678	0	-0.0968421	0.2984	-0.555099	0
-0.616592	0	-0.0760532	0.2194	-0.617752	0
-0.432062	0	0.0770661	0.2284	-0.395991	0
-0.432062	0	0.0770661	0.2302	-0.395991	0
-0.425351	0	-0.0870968	0.1382	-0.219967	0.002
-0.417732	0	0.00194013	0.4906	-0.28207	0
-0.415506	0	0.0677979	0.1782	-0.202953	0.001
-0.412319	0	-0.117895	0.2428	-0.430099	0.0006
-0.336634	0	0.254752	0.006	-0.269195	0
-0.332389	0	-0.112527	0.0692	-0.21485	0.0004
-0.332389	0	-0.112527	0.0718	-0.21485	0.0008
-0.329018	0	0.0757467	0.1784	-0.258802	0.0002
-0.325402	0	0.076412	0.1964	-0.244197	0.001
-0.32191	0	0.115022	0.0954	-0.27153	0
-0.301396	0.001	0.00640114	0.4636	-0.201585	0.0234
-0.298864	0.003	-0.109474	0.2712	-0.245536	0.026
-0.28607	0.0012	0.00929054	0.4612	-0.306238	0.0002
-0.262842	0.0016	0.170732	0.04	-0.00936664	0.443
-0.243846	0.0048	0.0926829	0.1684	-0.414362	0
-0.221613	0.001	-0.0603693	0.2446	-0.0696517	0.1564
-0.214383	0.0098	-0.133703	0.086	-0.202275	0.019
-0.213978	0.0182	-0.166667	0.084	-0.218097	0.0338
-0.212987	0.0014	0.0821082	0.126	-0.197166	0.0018
-0.209052	0.0032	0.0523147	0.243	-0.269089	0.0002
-0.203542	0.0038	0.0656866	0.2012	-0.298886	0
-0.202217	0.004	0.0586197	0.249	-0.184573	0.005
-0.201338	0.004	-0.00258054	0.4924	-0.246323	0.0002
-0.200289	0.025	0.00711238	0.4784	0.115757	0.1094
-0.19644	0.0088	0.0171488	0.434	-0.161209	0.009
-0.183381	0.0182	-0.068306	0.256	-0.231136	0.0032
-0.179536	0.0084	-0.0259618	0.3642	-0.201493	0.0004
-0.177253	0.0098	-0.0836722	0.1352	-0.247837	0
-0.176387	0.0108	-0.00609947	0.4682	-0.116807	0.04
-0.171545	0.0346	0.0443459	0.3282	-0.322034	0.0006
-0.171307	0.0296	-0.100486	0.1642	-0.113065	0.097
-0.170392	0.04	0.0290179	0.3984	0.346881	0
-0.167677	0.0474	0.00622524	0.4604	0.369237	0
-0.167142	0.0218	0.16094	0.0364	0.042975	0.2968
-0.166311	0.0392	0.0782705	0.2186	0.0330062	0.3556
-0.165912	0.021	-0.153524	0.0348	-0.0980681	0.1152
-0.162047	0.0484	0.0838137	0.2088	-0.276539	0.0032
-0.155057	0.018	0.0396465	0.2982	0.0722475	0.1228
-0.153026	0.0232	-0.00443459	0.4862	-0.0979758	0.0792
-0.152833	0.0324	0.00103306	0.4948	-0.177182	0.0076
-0.152302	0.0248	0.00750704	0.4584	-0.230262	0.0004
-0.151987	0.0194	0.0770253	0.1532	-0.112427	0.0554
-0.151278	0.0444	0.102004	0.1688	-0.0235653	0.3744
-0.14939	0.0214	-0.00242415	0.4778	-0.19722	0.0018
-0.147315	0.0304	0.0121951	0.444	-0.132231	0.0292
-0.144904	0.0274	0.0491085	0.2714	-0.262384	0
-0.134985	0.011	-0.0351377	0.3304	-0.0997055	0.047
-0.131935	0.0344	-0.0488636	0.2814	-0.251866	0.0002
-0.124046	0.0432	-0.0781201	0.1454	-0.0653255	0.1574
0.124179	0.0422	0.0481321	0.258	-0.0233603	0.347
0.140116	0.0392	-0.0228006	0.3916	0.081202	0.1324
0.142367	0.0408	0.12046	0.0674	0.169392	0.0104
0.150284	0.04	0.112629	0.1428	0.352503	0
0.151245	0.0426	-0.0482066	0.2844	-0.15104	0.0306
0.151801	0.0354	-0.0359161	0.3282	0.131936	0.0372
0.15692	0.0442	0.0261402	0.4014	0.185856	0.0354
0.161812	0.0276	0.0505376	0.2672	0.216534	0.0036
0.163791	0.0454	0.0862528	0.1956	-0.0773863	0.2054
0.164078	0.0218	0.145281	0.0422	0.293125	0.0002
0.164174	0.0264	0.197524	0.0106	0.136977	0.0444
0.165233	0.0254	-0.0240964	0.3894	0.263871	0
0.165455	0.0262	0.121072	0.088	0.189769	0.011
0.166667	0.03	0.0516499	0.2842	0.0282742	0.3582
0.167422	0.0184	-0.0298686	0.3624	0.252819	0.0016
0.171933	0.0404	0.298004	0.0008	0.0240856	0.4122
0.173992	0.0162	-0.00443906	0.4848	0.118029	0.0574
0.174892	0.0306	0.210997	0.0324	0.213397	0.0178
0.176699	0.0156	0.17264	0.0182	0.180053	0.0058
0.177637	0.0142	-0.0230024	0.384	0.137806	0.0326
0.177744	0.0142	0.16253	0.0232	0.251712	0
0.179529	0.0194	0.142027	0.048	0.111813	0.0688
0.179934	0.0298	0.0855856	0.2178	0.235245	0.007
0.181593	0.0408	0.239011	0.015	0.0432099	0.3294
0.185116	0.0138	-0.00675676	0.473	0.0392775	0.3286
0.185323	0.026	0.139921	0.0882	0.240286	0.0046
0.187889	0.022	0.067297	0.261	0.398305	0.0002
0.19018	0.0108	-0.0203793	0.3938	0.00614955	0.4624
0.191919	0.0348	-0.00127877	0.4842	0.407337	0.0002
0.192582	0.0278	0.100275	0.1736	0.04	0.3486
0.192911	0.0032	0.00473043	0.471	0.27444	0.0002
0.194517	0.029	0.0428389	0.3638	0.271451	0.0062
0.194536	0.0074	-0.0813953	0.1916	0.00478998	0.4796
0.19631	0.0236	-0.111768	0.1502	0.352447	0.0002
0.19765	0.0064	0.0119627	0.4446	0.364936	0
0.197735	0.0082	0.0156511	0.426	0.258507	0.0004
0.200793	0.009	-0.106638	0.1	0.0643606	0.1886
0.201515	0.0242	0.268817	0.0066	0.227941	0.0082
0.202244	0.002	-0.0352259	0.3174	0.0221024	0.363
0.202634	0.0244	-0.0454622	0.2904	0.457547	0
0.207228	0.0076	0.0322581	0.3528	0.273806	0.0002
0.207237	0.012	0.10489	0.1156	0.197861	0.0056
0.20749	0.0068	-0.0170092	0.405	-0.0153237	0.423
0.207504	0.0098	-0.043573	0.3298	0.23255	0.0038
0.208516	0.0246	0.0470467	0.3162	0.224198	0.0138
0.209155	0.0052	-0.00817191	0.4606	0.13536	0.0348
0.209163	0.013	-0.0118243	0.4568	0.243436	0.005
0.209659	0.0082	0.270795	0.0046	0.385592	0
0.210478	0.0136	-0.0293269	0.3908	0.166774	0.0238
0.211435	0.0072	0.174791	0.0194	0.443071	0
0.212687	0.0124	0.141047	0.0856	0.303928	0.0002
0.213555	0.0034	0.029102	0.3664	0.229489	0.0006
0.215441	0.003	0.0617788	0.245	0.28287	0.0004
0.215659	0.0214	0.272665	0.0048	0.0802469	0.2176
0.215965	0.0038	0.027957	0.3656	0.177797	0.0104
0.216003	0.01	-0.10107	0.1656	0.288805	0.0006
0.21622	0.0058	0.258115	0.002	0.284078	0
0.216473	0.0042	0.092842	0.135	-0.0046308	0.469
0.218375	0.0032	-0.0932203	0.1258	0.227952	0.0006
0.218681	0.014	0.10989	0.1622	-0.0466667	0.3214
0.220202	0.0152	-0.108056	0.2074	0.555024	0
0.220771	0.0114	0.0822072	0.2208	0.310649	0.0008
0.221162	0.003	-0.0175545	0.4062	0.321523	0
0.221453	0.0074	0.0828699	0.2066	0.297779	0.0016
0.222762	0.002	0.0848115	0.1726	0.0995329	0.0752
0.223333	0.01	0.121355	0.118	0.177419	0.0316
0.224295	0.0124	0.0594032	0.2838	0.155009	0.0552
0.224675	0.0044	-0.0673203	0.249	0.0224888	0.406
0.22471	0.0102	-0.154279	0.0668	0.182735	0.0254
0.22474	0.0086	0.194383	0.031	0.217417	0.0192
0.225284	0.0082	-0.125076	0.1252	0.486691	0
0.225566	0.0142	-0.192745	0.0744	0.362236	0
0.227733	0.0032	0.119773	0.0882	0.26926	0.0002
0.228027	0.0108	0.067286	0.2766	0.26339	0.0036
0.229346	0.0036	-0.110692	0.1068	0.143239	0.0352
0.229666	0.0022	0.0253286	0.3854	0.226635	0.0016
0.229757	0.0044	0.0690291	0.2088	0.170666	0.0112
0.230189	0.0088	0.0610088	0.2828	0.474549	0
0.230495	0.0142	0.324519	0.0012	0.14	0.0862
0.231125	0.0026	0.0955627	0.1372	0.171095	0.0146
0.231457	0.005	0.12244	0.1072	0.283192	0.0008
0.231655	0.0056	0.00850461	0.4668	0.377789	0
0.232143	0.0118	0.0226648	0.4246	-0.128642	0.1082
0.232175	0.0092	0.00151012	0.4926	0.26087	0.0016
0.234038	0.0084	-0.00703829	0.4768	0.268011	0.0022
0.23621	0.0038	0.20978	0.0086	0.201313	0.005
0.236318	0.0064	-0.053491	0.31	0.20815	0.0174
0.236716	0.0026	0.133522	0.0666	0.195083	0.004
0.237229	0.0088	0	0.4866	0.537161	0
0.237387	0.0016	-0.063576	0.2442	0.0592299	0.2252
0.23959	0.0012	0.0805257	0.1692	0.187114	0.0092
0.242281	0.0018	-0.0101897	0.4518	0.220266	0.001
0.243333	0.0058	0.186535	0.0408	0.158856	0.0564
0.244337	0.0002	0.0281959	0.3614	0.195057	0.0054
0.245588	0.0014	0.0180288	0.4194	0.161474	0.0184
0.246642	0.0264	0.119811	0.1662	0.314078	0.002
0.247869	0.0016	0.100486	0.175	0.310134	0
0.248229	0.0028	0.0565556	0.256	0.385367	0
0.248285	0.0016	0.0284504	0.3594	0.359679	0
0.249367	0.0014	0.133806	0.0622	0.358508	0
0.250581	0.0004	0.0534091	0.2872	0.149706	0.014
0.252249	0.0022	0.135706	0.0848	0.255698	0.006
0.25228	0.0052	-0.0309685	0.3844	0.242176	0.0058
0.252381	0.0022	-0.0148148	0.4422	0.0931201	0.1504
0.25372	0.0094	-0.0718367	0.2572	0.26899	0.0014
0.254085	0.0004	0.0932031	0.1482	0.254063	0.0006
0.254176	0.0004	0.0984941	0.135	0.333261	0
0.254182	0.0008	-0.0335149	0.337	0.169417	0.0142
0.255896	0.0016	-0.0364205	0.3268	0.251712	0
0.256324	0.0094	-0.124082	0.0954	0.357452	0
0.257244	0.0012	0.115968	0.132	0.257143	0.0016
0.257988	0.0006	0.0375797	0.3182	0.18403	0.0108
0.259088	0.0002	-0.0492298	0.2902	-0.0304901	0.3532
0.260554	0.002	-0.164627	0.0446	0.225015	0.012
0.260754	0.0014	0.134231	0.0592	0.353119	0
0.261256	0.0002	0.13024	0.0662	0.269117	0.0008
0.261435	0.0036	0.0825036	0.273	0.207967	0.015
0.261938	0.0022	-0.114294	0.1284	0.509643	0
0.264186	0.0004	0.00119474	0.4968	0.263411	0.0004
0.264196	0.0004	-0.0731707	0.2738	0.538462	0
0.26455	0.001	0.205386	0.0108	0.306306	0
0.266534	0.0038	0.0410752	0.3608	0.106575	0.131
0.267485	0.0066	-0.0661224	0.2676	0.244231	0.0072
0.26753	0.0004	0.194026	0.007	0.378543	0
0.267756	0.0008	0.0840923	0.2074	0.323077	0
0.268851	0.0016	0.0202693	0.4112	0.242822	0.0008
0.269484	0.0002	0.0810773	0.1854	0.221857	0.002
0.269512	0.0162	0.0339721	0.3934	0.0846395	0.299
0.270955	0.009	-0.0885856	0.1808	0.340865	0.001
0.27128	0.0014	-0.0920467	0.182	0.248393	0.007
0.272585	0.001	0.0925926	0.1872	0.252747	0.001
0.277156	0.0026	0.0464527	0.3334	0.326402	0.0004
0.278297	0.0044	-0.0305632	0.3852	0.132346	0.0958
0.279396	0.0022	0.21978	0.02	0.165185	0.0534
0.279687	0.0006	0.0673953	0.2712	0.386813	0
0.28022	0.005	0.15831	0.0706	0.245185	0.0066
0.281509	0.0006	0.0396959	0.3346	0.180844	0.0292
0.282009	0.0004	-0.117364	0.0904	0.358255	0
0.282309	0.0002	0.232378	0.0002	0.312641	0
0.282661	0	-0.0691634	0.211	0.155214	0.0236
0.283907	0.001	0.11297	0.0894	0.181359	0.0092
0.284696	0.0066	-0.00512821	0.4816	0.485507	0
0.285931	0.0008	0.0552799	0.2614	-0.0538015	0.236
0.286102	0.001	0.0392461	0.3504	-0.0452721	0.3152
0.286277	0.001	0.00168919	0.4974	0.249317	0.0038
0.286437	0.0002	0.148972	0.0418	0.316326	0
0.289179	0.0006	-0.0816441	0.2068	0.255829	0.0034
0.289727	0.0002	0.173636	0.0204	0.126042	0.053
0.290615	0	-0.0597372	0.2366	0.296852	0.0002
0.292033	0.0012	0.144231	0.0852	0.18963	0.029
0.292734	0.0006	0.110122	0.1534	0.209527	0.021
0.29291	0.0012	-0.160473	0.064	0.186305	0.029
0.293407	0.0026	0.018544	0.4286	0.0641975	0.2536
0.295879	0.0022	-0.0683379	0.2626	0.0953086	0.1732
0.296009	0	0.0258065	0.3776	0.372364	0
0.296154	0.0014	0.140797	0.0974	0.182469	0.0326
0.296703	0.0012	0.265797	0.0088	0.348148	0.0008
0.297253	0.002	0.0319368	0.3906	0.0844444	0.2004
0.297295	0	0.115317	0.0838	0.201702	0.0054
0.297527	0.001	0.207074	0.027	0.0790123	0.2218
0.29795	0.0002	0.0500354	0.2892	0.304622	0
0.301374	0.0008	0.151099	0.0834	0.175802	0.0404
0.302198	0.002	0.201923	0.0364	0.225432	0.0174
0.30377	0.0004	0.0739901	0.2042	0.288204	0.0004
0.303846	0.0018	0.25	0.0114	0.232099	0.0108
0.304252	0	0	0.4982	0.133659	0.0458
0.304671	0.0002	0.0144605	0.4438	0.295149	0.0016
0.306149	0	-0.123059	0.07	0.284299	0.0002
0.307116	0.0002	-0.202507	0.0112	0.132646	0.0418
0.307228	0	0.0480287	0.2802	0.161812	0.0198
0.307418	0.002	0.0645604	0.2852	0.0728395	0.2142
0.308043	0.0004	-0.0191441	0.4224	0.287965	0.0012
0.308342	0.0006	-0.0763901	0.1796	0.312607	0.0018
0.309341	0.0018	0.222871	0.0214	0.0609877	0.2872
0.309862	0.0006	-0.211624	0.019	0.254237	0.0082
0.310427	0.0002	0.0398671	0.3634	0.147402	0.0588
0.310785	0.0008	0.0376956	0.3958	0.171875	0.0434
0.311813	0.0002	0.0120192	0.441	-0.04	0.3466
0.31219	0	0.109319	0.1002	0.339708	0
0.312406	0	-0.0227001	0.3904	0.301167	0
0.312976	0.0006	-0.0378198	0.3464	0.323495	0.0008
0.313433	0.0004	0.0861486	0.203	0.394245	0
0.315052	0.0008	0.086485	0.2044	0.157218	0.0682
0.315536	0.0002	0.146421	0.0492	0.343942	0
0.31592	0.0006	0.0661599	0.2646	0.511237	0
0.316335	0.0004	0.00253378	0.498	0.238605	0.0084
0.317033	0.0012	0.200549	0.033	0.0975309	0.1668
0.318038	0	-0.000639386	0.4956	0.366188	0.0002
0.319652	0.0002	-0.0917793	0.1998	0.393825	0
0.31978	0.0006	0.103365	0.183	0.0501235	0.3118
0.319784	0	-0.151616	0.0318	0.133475	0.0372
0.322748	0	0.0301914	0.3612	0.177233	0.01
0.322968	0.0002	-0.0833333	0.21	0.201848	0.016
0.32386	0	0.12096	0.0886	0.090549	0.1298
0.325824	0.0006	0.126374	0.121	0.150617	0.07
0.325919	0.0004	-0.0228365	0.4072	0.146218	0.0518
0.326614	0	-0.0585926	0.2558	0.190954	0.0078
0.326838	0.0002	0.0637019	0.2704	0.0554622	0.2648
0.326888	0	0.0364944	0.3226	0.282317	0.0002
0.327556	0	0.097236	0.1336	0.134883	0.0422
0.327556	0	0.0500354	0.2734	0.285594	0
0.327682	0	0.060241	0.2372	0.265892	0.0002
0.328885	0	0.194275	0.0104	0.228973	0.0018
0.333863	0	0.0619148	0.2822	0.181513	0.0298
0.334196	0.0002	0.119474	0.0802	0.259292	0.0004
0.334199	0	-0.00827887	0.46	0.228719	0.0064
0.3354	0	0.0392629	0.3362	0.229603	0.0004
0.335814	0	0.197133	0.0094	0.418358	0
0.33603	0	0.0821983	0.1696	0.465823	0
0.336285	0	0.0232459	0.3884	0.27608	0.0002
0.336332	0.0004	-0.0508899	0.3116	0.281122	0.005
0.339035	0.0004	0.0990392	0.2138	0.366382	0
0.339062	0	0.0992714	0.179	0.301954	0
0.339266	0	0.0206691	0.4082	0.257134	0.0004
0.339683	0.0002	0.0204604	0.4392	0.140351	0.0882
0.342136	0	0.045098	0.3154	0.313843	0.0008
0.342179	0	0.00549565	0.479	0.355278	0
0.347253	0.0002	0.288118	0.0054	0.28716	0.0022
0.349725	0.0008	0.0858516	0.217	0.171111	0.0408
0.35206	0	-0.122471	0.0856	0.179164	0.0104
0.352819	0.0004	0.0228041	0.4152	0.089687	0.1798
0.358779	0	-0.0678043	0.228	0.216562	0.0032
0.360904	0	0.138232	0.0986	0.332703	0.0004
0.36194	0	0.0166104	0.4376	0.494644	0
0.363187	0.0002	0.246566	0.0142	0.354321	0.0004
0.368015	0	-0.015625	0.4342	0.0180995	0.4236
0.371107	0	0.0125139	0.4458	0.399182	0
0.374747	0	0.108575	0.1124	0.128484	0.0486
0.377358	0.0002	-0.0700695	0.2604	0.379463	0
0.382255	0	0.179336	0.0422	0.332283	0.0004
0.382418	0	-0.127747	0.1256	0.213086	0.0182
0.384336	0	0.0267291	0.3818	0.262159	0.0002
0.387427	0	-0.00794045	0.473	0.515385	0
0.387645	0	-0.0639077	0.2754	0.443394	0
0.387912	0.0004	0.200549	0.0314	0.180494	0.0364
0.390615	0	-0.00489845	0.4846	0.350495	0
0.392267	0	-0.161281	0.0364	0.202837	0.005
0.392367	0	0.0506457	0.2628	0.329769	0
0.393756	0	0.163027	0.0298	0.299819	0.0002
0.394911	0	-0.475687	0	-0.252211	0.0006
0.395156	0	0.0553393	0.2744	0.273524	0.0016
0.397037	0	0.12693	0.0954	0.306756	0.0014
0.400419	0	-0.0487768	0.2846	0.260962	0.0006
0.415385	0	0.215316	0.023	0.26963	0.004
0.416488	0	-0.118256	0.1766	0.618234	0
0.419569	0	-0.0574324	0.2916	0.585171	0
0.425	0	-0.139904	0.0676	0.168197	0.02
0.425275	0	0.0618132	0.2788	0.234568	0.0112
0.426245	0	-0.054102	0.3084	0.622658	0
0.42891	0	-0.16141	0.0228	0.368736	0
0.439777	0	0.0559887	0.2714	0.396986	0
0.442539	0	0.0916061	0.138	0.385535	0
0.448	0	0.0398609	0.2972	0.355741	0
0.448381	0	0.149256	0.0448	0.341669	0
0.451025	0	0.0886499	0.1484	0.449348	0
0.455448	0	-0.0164875	0.4134	0.2792	0
0.455592	0	0.102481	0.1172	0.412646	0
0.459577	0	-0.138795	0.095	0.529091	0
0.459577	0	-0.219032	0.0154	0.501995	0
0.463443	0	0.0578087	0.2358	0.404123	0
0.469256	0	-0.0996456	0.12	0.371895	0
0.481771	0	-0.0257143	0.4228	0.339904	0.0002
0.486339	0	-0.108647	0.2038	0.649003	0
0.493681	0	-0.00755495	0.475	0.23284	0.0096
0.496683	0	-0.0292793	0.3818	0.415459	0
0.498626	0	0.0394918	0.3624	0.25037	0.0052
0.499176	0	0.0552885	0.3032	0.201481	0.0226
0.506434	0	0.0701923	0.2328	0.284551	0.0006
0.51762	0	-0.0748874	0.2444	0.435203	0
0.519071	0	0.203547	0.0264	0.507036	0
0.522595	0	-0.0239302	0.403	0.547154	0
0.529022	0	-0.143581	0.0904	0.188826	0.021
0.534617	0	-0.0664188	0.2078	0.481132	0
0.539386	0	0.0945946	0.1626	0.390464	0
0.557007	0	0.104167	0.1618	0.496534	0
0.558257	0	0.0142248	0.4716	0.616637	0
0.580164	0	0.14367	0.1262	0.658671	0
0.583126	0	0.0523649	0.31	0.510397	0
0.587065	0	-0.0461712	0.3306	0.606385	0
0.624171	0	0.0205518	0.4216	0.500735	0
0.712224	0	0.183127	0.0278	0.555263	0
0.799873	0	0.148387	0.0498	0.57193	0
0.802632	0	0.148387	0.0546	0.655288	0
0.0729911	0.0518	0.22	0.0206	0.166827	0.042
0.132933	0.0534	0.141546	0.0396	0.0790356	0.146
0.140919	0.049	0.212417	0.0112	0.212087	0.013
0.152355	0.0556	0.045898	0.3248	-0.10058	0.1604
-0.137784	0.056	0.114451	0.1372	0.128938	0.057
0.14573	0.056	-0.0743243	0.2378	0.231674	0.006
0.187002	0.0462	0.0299145	0.4164	0.406355	0.0004
0.139489	0.0572	0.0704311	0.2546	0.140293	0.0454
0.141912	0.0574	0.0572115	0.28	0.0223659	0.3988
0.169505	0.0482	0.148695	0.0892	0.094321	0.1846
0.161813	0.0582	-0.0236951	0.4116	0.151111	0.0658
0.154121	0.0584	-0.17457	0.0524	0.278897	0.0006
0.124488	0.0598	-0.0390681	0.3226	0.17819	0.0128
-0.115175	0.0598	-0.00138581	0.4946	-0.114744	0.0516
-0.155272	0.0606	0.22973	0.0396	0.0547975	0.293
0.135085	0.063	0.0412872	0.3414	0.303663	0
0.110701	0.0632	-0.0528092	0.2248	0.0313567	0.3206
0.190909	0.0436	0.0336842	0.4268	-0.136161	0.1514
0.158791	0.0646	0.207418	0.0356	0.230617	0.0086
-0.147315	0.0648	0.169401	0.0438	-0.381579	0
-0.145959	0.0654	0.0432373	0.3296	-0.296833	0.001
0.110701	0.0656	-0.0528092	0.2338	0.0313567	0.3174
-0.131818	0.0656	-0.0704311	0.2486	-0.122955	0.0694
0.137023	0.0658	-0.00900901	0.4694	0.217391	0.007
0.12307	0.0666	0.0567998	0.2362	0.168204	0.0108
0.106527	0.067	-0.0113078	0.4448	-0.0261456	0.3406
0.146504	0.0676	-0.0363751	0.3546	0.266173	0.0032
0.154018	0.0684	0.10898	0.1634	0.16226	0.0392
0.106527	0.0702	-0.0113078	0.4374	-0.0261456	0.337
0.0757876	0.0714	-0.562972	0	-0.368276	0
0.101875	0.072	-0.118406	0.0406	0.0212489	0.378
0.121569	0.072	0.131356	0.0568	0.194689	0.0046
0.133391	0.0732	0.112069	0.1438	0.204559	0.021
0.120388	0.074	-0.134886	0.0522	0.0685496	0.1932
-0.105706	0.0744	0.122728	0.0354	0.0546271	0.2028
0.109991	0.0776	-0.0220944	0.385	0.231936	0.0004
0.13818	0.0782	0.107397	0.2044	0.322183	0.0004
0.123355	0.0788	0.0500354	0.2788	0.0617159	0.228
0.121165	0.0792	0.121736	0.12	0.181929	0.0116
0.142816	0.0792	0.0186012	0.4396	0.34795	0.001
0.122727	0.083	0.0461445	0.3384	0.273871	0.0008
-0.064148	0.0838	0.123475	0.0552	0.101125	0.0214
-0.102952	0.0846	0.0154051	0.4184	-0.0528877	0.2212
0.117472	0.085	0.0898604	0.197	0.167766	0.0254
0.132048	0.0852	0.0565878	0.294	0.388784	0
0.140879	0.0856	-0.100742	0.1826	0.00865801	0.4696
0.046374	0.0862	-0.155617	0.0048	-0.0544649	0.18
0.0918172	0.0864	0.353383	0	0.228841	0
-0.103739	0.0864	-0.06467	0.1904	-0.126758	0.029
0.0918172	0.0872	0.353383	0	0.228841	0.0002
0.126471	0.0886	-0.0305895	0.3834	0.290181	0.0026
0.127076	0.0892	0.123967	0.0796	0.340854	0
0.0823085	0.0896	-0.278375	0	0.00892419	0.4626
0.0963328	0.0918	-0.0925345	0.0886	0.0898023	0.08
0.1285	0.092	0.0999698	0.1832	0.142276	0.0628
0.107551	0.0926	-0.14325	0.0358	0.0666863	0.2032
0.120597	0.093	0.095932	0.1854	0.36337	0
0.109924	0.0936	-0.0280765	0.363	0.0049034	0.4754
-0.127544	0.0938	-0.00443459	0.4728	-0.225691	0.0078
0.125207	0.0992	-0.188345	0.0354	0.289855	0.0014
-0.113352	0.1004	0.128415	0.1112	-0.0468864	0.2926
-0.0975277	0.1014	-0.0144124	0.4414	0.0547371	0.2198
-0.0728847	0.103	0.092665	0.0804	-0.0187108	0.3898
-0.126851	0.1072	0.00892857	0.4792	0.524421	0
-0.0723871	0.1082	0.0169034	0.4046	-0.0792062	0.0852
0.119303	0.1102	0.0825893	0.275	0.275223	0.0038
-0.0901108	0.113	0.0036031	0.4814	-0.109354	0.0556
0.114557	0.1158	-0.0115299	0.4558	-0.0573149	0.2878
0.113184	0.1164	-0.0926239	0.189	0.182735	0.028
-0.0869736	0.1164	0.0290898	0.3472	-0.0117889	0.4276
0.122496	0.1196	0.122768	0.1702	0.418538	0
-0.0886265	0.1196	-0.0426181	0.2906	-0.13422	0.025
-0.115332	0.12	0.095122	0.1646	-0.269848	0.0036
-0.0767414	0.1252	0.0987645	0.0474	-0.0524551	0.1906
0.0461138	0.1268	-0.150609	0.0054	-0.0676846	0.1186
0.103551	0.1272	-0.0622344	0.2888	0.149939	0.041
0.108548	0.1276	-0.0254989	0.397	0.140723	0.0718
-0.125253	0.1282	0.136829	0.1408	0.046252	0.33
0.0860701	0.1292	0.0314961	0.3264	-0.0748877	0.1306
0.0949668	0.131	0.0955627	0.13	0.109903	0.0796
-0.0837466	0.1374	-0.0137629	0.4204	-0.0757084	0.1312
-0.10157	0.139	-0.0472284	0.3198	-0.029884	0.3848
0.087358	0.141	0.0215543	0.4214	0.236996	0.0028
0.0878101	0.1416	0.117085	0.0772	0.109738	0.0864
0.0811594	0.1464	-0.017184	0.4226	0.0441969	0.2646
0.090483	0.1468	0.248634	0.0096	0.242125	0.0022
-0.099244	0.147	-0.0170732	0.4404	-0.176405	0.0322
-0.0979779	0.1502	-0.0391827	0.3534	-0.0255979	0.3898
0.0883523	0.1564	0.125683	0.1144	0.108303	0.0968
0.0795038	0.157	-0.0703704	0.1996	0.20153	0.0042
-0.099663	0.1584	0.150071	0.126	0.00660211	0.4754
0.092869	0.1614	0.089527	0.189	0.26087	0.0036
0.0977298	0.163	0.11708	0.1354	0.206791	0.0126
0.0882353	0.165	0.0906563	0.1968	-0.0575687	0.2852
0.102792	0.1678	0.0135135	0.456	0.21831	0.0158
0.0987013	0.1682	0.140665	0.1306	0.266348	0.0084
0.071176	0.1772	-0.000535045	0.49	0.100949	0.099
0.0856136	0.1782	-0.044482	0.3332	0.0218442	0.4124
0.0768892	0.184	0.125189	0.0828	0.116986	0.0678
0.0603195	0.1842	-0.123249	0.0664	-0.131944	0.0476
0.0767045	0.1888	0.238616	0.0138	0.291575	0.0002
0.0897595	0.1888	-0.0275901	0.4046	0.256879	0.0042
0.0700368	0.1896	-0.156971	0.0522	0.0586942	0.247
0.0780842	0.1956	-0.0877976	0.2644	0.28877	0.0024
-0.0792279	0.1986	0.197596	0.0246	-0.0848093	0.163
-0.0864509	0.1992	0.11286	0.1218	-0.216548	0.014
0.0730051	0.1998	0.0321377	0.3692	-0.00685435	0.4662
0.0640693	0.2002	-0.0313575	0.3318	-0.104478	0.0672
0.0595922	0.2022	-0.00959091	0.4332	-0.0328841	0.3268
-0.0691478	0.2036	0.0867384	0.1538	-0.0297146	0.3518
0.0668329	0.2106	0.172764	0.0208	0.150564	0.0334
0.071875	0.214	0.0255009	0.409	0.288645	0.0006
0.0482895	0.2146	-0.0735627	0.1226	-0.0398235	0.2944
0.0813853	0.2152	-0.163683	0.1128	-0.0216906	0.4172
0.0519978	0.2196	-0.0215499	0.3546	-0.00709793	0.4574
0.0635965	0.22	-0.083014	0.157	0.227795	0.004
0.0704809	0.2314	-0.00731982	0.4842	0.26087	0.0032
-0.0587918	0.234	-0.100358	0.12	-0.163774	0.0194
0.059676	0.2342	0.0414357	0.3148	0.0412624	0.297
0.0607847	0.2354	0.00807103	0.4536	0.0821104	0.1392
-0.061165	0.2368	-0.034767	0.347	-0.13298	0.0468
0.0755495	0.2384	0.084478	0.2236	0.0128395	0.4634
-0.0532822	0.2404	0.0803769	0.1678	-0.108636	0.0562
0.0692641	0.2424	0.0204604	0.43	0.133652	0.1014
0.0520034	0.2436	-0.10061	0.1296	0.155647	0.0116
0.070202	0.2448	0.0183928	0.431	0.331876	0
0.0735931	0.25	0.131074	0.1504	-0.0242424	0.4154
-0.0522629	0.2504	-0.0170472	0.4006	-0.00243348	0.4824
-0.0619485	0.2576	0.0617788	0.2698	0.0542986	0.2608
-0.0597015	0.2586	0.0698448	0.2384	0.028769	0.391
0.0505933	0.2642	-0.229152	0.003	-0.095126	0.1128
0.0425691	0.2642	-0.210852	0	0.111772	0.0296
0.0520153	0.2666	0.101886	0.1208	0.196575	0.0106
-0.0583446	0.2704	-0.0359202	0.3532	-0.168599	0.0396
-0.0551471	0.2708	-0.0158654	0.428	-0.00542986	0.4806
-0.0426245	0.2744	0.138654	0.0288	0.0934861	0.0818
0.0541217	0.275	0.0507246	0.2952	0.0741088	0.201
-0.0399562	0.2802	0.0104198	0.4404	-0.0720575	0.1376
0.0349462	0.2828	0.27891	0.0004	0.191187	0.0104
0.0563847	0.2836	-0.000844595	0.4996	-0.0226843	0.4242
-0.0623377	0.2846	0.00959079	0.4566	0.233812	0.0168
-0.0443133	0.2892	-0.0762434	0.166	0.0534826	0.222
0.0432578	0.29	0.172282	0.015	0.180053	0.0074
0.0637611	0.2906	0.0673953	0.2572	0.1125	0.109
0.0433333	0.2908	-0.282589	0.0006	-0.127496	0.0416
0.055303	0.291	-0.0684776	0.2576	0.174682	0.0364
0.0545455	0.2928	-0.00575448	0.4948	0.0829346	0.2194
0.0518242	0.294	0.0489865	0.3232	-0.122243	0.098
-0.050995	0.297	0.098536	0.1756	0.0777148	0.2032
-0.0478775	0.2998	0.0654102	0.2504	-0.225022	0.0088
0.0350332	0.302	-0.0982545	0.1096	-0.00063012	0.5062
0.0440341	0.3026	0.0215543	0.4266	0.292552	0.0008
0.0312637	0.304	-0.307005	0.0018	-0.275802	0.0016
-0.0468006	0.3058	0.119048	0.0912	0.0720721	0.3002
-0.0319693	0.3062	-0.0776053	0.1468	-0.0183255	0.3816
0.0463235	0.3078	0.0286058	0.389	-0.0703297	0.2056
0.0416466	0.3136	0.125889	0.156	0.152729	0.0494
0.0348933	0.3162	0.0165769	0.4056	0.128931	0.0258
-0.0496392	0.319	0.174552	0.0914	-0.0216906	0.4258
-0.0470247	0.3206	0.0697222	0.2386	0.378253	0
0.0450169	0.3228	0.0611664	0.3172	0.0347711	0.3574
-0.0441219	0.3294	0.0126488	0.4698	0.284848	0.0026
0.0470418	0.33	0.0658568	0.3052	-0.0682616	0.2674
-0.0447025	0.3302	0.0342262	0.3964	0.365062	0.0006
0.0412871	0.3312	-0.137472	0.0924	-0.166369	0.0446
-0.0373514	0.3364	0.162841	0.0286	0.0138311	0.4416
-0.0293265	0.3372	-0.0564024	0.247	0.015451	0.4046
-0.0439394	0.3374	-0.131862	0.0992	0.0697536	0.2214
0.031746	0.3412	0.106447	0.0726	0.0118149	0.4208
0.031746	0.3416	0.106447	0.0654	0.0118149	0.4298
0.0351103	0.343	-0.0870192	0.194	-0.0911441	0.1348
-0.0358597	0.3434	0.00665188	0.487	-0.122212	0.0992
0.0383838	0.3484	0.0249361	0.4234	0.108134	0.1542
0.0282967	0.3534	-0.298764	0.0016	-0.285679	0.0004
0.0392496	0.3534	0.194373	0.0606	0.120255	0.1392
-0.038897	0.3556	-0.165179	0.0844	0.269162	0.0034
0.0350843	0.3556	-0.00842572	0.4784	0.142953	0.0688
-0.033146	0.356	-0.0257206	0.398	-0.169715	0.0388
-0.0345028	0.3564	0.0250554	0.4104	-0.331624	0.0004
0.0282967	0.3572	-0.298764	0.0024	-0.285679	0.0018
0.0316761	0.359	0.198846	0.0268	0.113797	0.0884
0.0302316	0.361	0.10452	0.0956	0.21789	0.0012
-0.0348901	0.3672	-0.0350275	0.3742	-0.0787654	0.2204
-0.0310606	0.3678	-0.0582909	0.3	0.00516693	0.476
0.02422	0.3696	-0.0734119	0.1492	0.0936658	0.0768
0.0269432	0.3698	0.134146	0.044	0.0856378	0.1396
-0.0315953	0.3728	0.0161863	0.431	0.215433	0.0174
-0.0237702	0.3736	-0.0265874	0.3674	0.0401795	0.2732
-0.0231613	0.375	0.0613636	0.2332	0.0429104	0.2572
0.0229201	0.3768	0.087739	0.1038	0.0049416	0.4788
0.0257802	0.3818	0.0252772	0.399	0.148974	0.0588
-0.024085	0.3826	0.0143103	0.4246	-0.0900389	0.0904
-0.0250829	0.3838	0.102759	0.166	0.0333963	0.3624
0.0312076	0.3852	0.148559	0.0656	0.00044603	0.4992
-0.0245739	0.3906	-0.013054	0.4502	0.16337	0.0294
0.0205939	0.392	0.0735895	0.1454	-0.0401168	0.2692
0.0264423	0.395	-0.113395	0.0962	0.0747664	0.1736
-0.0302663	0.3958	-0.0236794	0.4234	-0.0389706	0.335
0.0165457	0.4052	-0.183036	0.0588	0.307308	0.0006
-0.0193182	0.4084	0.162113	0.061	0.21514	0.0036
0.0178977	0.4092	-0.0121433	0.4572	0.232845	0.0026
0.0213564	0.415	-0.168798	0.1024	0.124721	0.1266
0.0296524	0.4306	0.182286	0.005	0.0566936	0.2054
0.0134409	0.437	0.0400287	0.324	-0.0347613	0.3396
0.0164835	0.4382	-0.339286	0.0004	-0.395802	0
-0.0172727	0.4414	-0.31551	0.0004	-0.140902	0.0504
0.0120879	0.4418	0.142857	0.0918	-0.0802469	0.213
0.0136029	0.444	0.046875	0.3358	0.0355527	0.331
-0.00834748	0.4536	-0.0875179	0.1686	0.0455324	0.3008
-0.00620275	0.4592	-0.0219512	0.4026	-0.0521855	0.2784
0.00860324	0.4604	-0.0177179	0.4088	0.0350257	0.3268
-0.0057971	0.4608	-0.118902	0.083	-0.0852198	0.1116
0.0145455	0.4638	-0.134777	0.0484	0.0614439	0.2062
0.00551524	0.4774	-0.0605556	0.2634	0.635294	0
-0.00355774	0.4796	0.00242733	0.4906	-0.0334232	0.3054
-0.00808081	0.4798	0.0869565	0.2408	0.155024	0.0826
-0.00355114	0.4802	0.00303582	0.4932	0.233944	0.004
0.00228257	0.4804	-0.0108696	0.4474	-0.111345	0.0556
-0.00411932	0.4808	0.327262	0.0012	0.289499	0.0008
-0.00251987	0.486	-0.0940133	0.1636	-0.175736	0.0358
0.001443	0.4952	0.0434783	0.3754	0.277193	0.0034
0.00467033	0.5674	-0.326923	0.0006	-0.550123	0
0.00467033	0.5718	-0.326923	0.0002	-0.550123	0

## Sheet: mean abs. cue sel. in L I H gr.
	auditory	visual	auidovisual	number of neurons
low	0.0765283	0.09205	0.145425	238
	0.0449868	0.0843976	0.115343	0
intermediate	0.210047	0.0858131	0.218717	134
	0.0282847	0.0697603	0.11859	0
high	0.364362	0.0934764	0.292138	187
	0.0992538	0.0705572	0.143744	0

## Sheet: vis sel. for AV and V neurons
auditory - visual neurons (n=150)								visual neurons (n = 46)
auditory selectivity	permutation test	visual selectivity	permutation test	multisensory selectivity	permutation test			auditory selectivity	permutation test	visual selectivity	permutation test	multisensory selectivity	permutation test
0.140919	0.054	-0.562972	0	0.212087	0.013			0.00467033	0.5718	-0.326923	0.0002	-0.550123	0
0.394911	0	-0.475687	0	-0.252211	0.0006			0.0546703	0.5674	-0.326923	0.0006	-0.550123	0
0.164078	0.0218	-0.339286	0.0004	0.293125	0.0002			0.0312637	0.004	-0.307005	0.0018	-0.275802	0.0016
0.164174	0.0264	-0.31551	0.0004	0.136977	0.0444			0.0282967	0.3534	-0.298764	0.0016	-0.285679	0.0004
0.459577	0	-0.219032	0.0154	0.501995	0			0.0282967	0.3572	-0.298764	0.0024	-0.285679	0.0018
0.309862	0.0006	-0.211624	0.019	0.254237	0.0082			0.0433333	0.2908	-0.282589	0.0006	-0.127496	0.0416
0.307116	0.0002	-0.202507	0.0112	0.132646	0.0418			0.0823085	0.0896	-0.278375	0	0.00892419	0.4626
0.125207	0.0992	-0.188345	0.0354	0.289855	0.0014			0.0757876	0.0714	-0.229152	0.003	-0.368276	0
0.42891	0	-0.16141	0.0228	0.368736	0			0.0425691	0	-0.210852	0	0.111772	0.0296
0.392267	0	-0.161281	0.0364	0.202837	0.005			0.0700368	0.0006	-0.156971	0.0522	0.0586942	0.247
0.319784	0	-0.151616	0.0318	0.133475	0.0372			0.046374	0.0862	-0.155617	0.0048	-0.0544649	0.18
-0.336634	0	0.254752	0.006	-0.269195	0			0.0296524	0.038	-0.153524	0.0348	0.0566936	0.2054
-0.167141	0.0218	0.16094	0.0364	0.042975	0.2968			0.0461138	0.1268	-0.150609	0.0054	-0.0676846	0.1186
-0.147315	0.0648	0.169401	0.0438	-0.381579	0			-0.00411932	0.4808	-0.14325	0.0358	0.289499	0.0008
0.0316761	0.359	0.198846	0.0268	0.113797	0.0884			0.0145455	0.4638	-0.134777	0.0484	0.0614439	0.2062
0.0767045	0.1888	0.238616	0.0138	0.291575	0.0002			0.101875	0.072	-0.118406	0.0406	0.0212489	0.378
0.090483	0.1468	0.248634	0.0096	0.242125	0.0022			0.0134409	0.437	0.122728	0.0354	-0.0347613	0.3396
0.0918172	0.0864	0.353383	0	0.228841	0			-0.155272	0.0606	0.123475	0.0152	0.0547975	0.293
0.0918172	0.0872	0.353383	0	0.228841	0.0002			0.0668329	0.2106	0.162841	0.0286	0.150564	0.0334
0.121165	0.0792	0.141736	0.049	0.181929	0.0116			0.0302316	0.361	0.172764	0.0208	0.21789	0.0012
0.132933	0.0534	0.141546	0.0396	0.0790356	0.146			0.0767045	0.1888	0.182286	0.005	0.291575	0.0002
0.13818	0.0782	0.157397	0.02044	0.322183	0.0004			0.107551	0.0926	0.197596	0.0246	0.0666863	0.2032
0.142367	0.0408	0.194383	0.031	0.169392	0.0104			-0.0373514	0.3364	0.198846	0.0268	0.0138311	0.4416
0.142367	0.0408	0.15046	0.0474	0.169392	0.0104			0.0316761	0.359	0.22	0.0206	0.113797	0.0884
0.158791	0.0646	0.207418	0.0356	0.230617	0.0086			-0.0551471	0.2708	0.22973	0.0396	-0.00542986	0.4806
0.165455	0.0262	0.151072	0.048	0.189769	0.011			0.0729911	0.0518	0.238616	0.0138	0.166827	0.042
0.171933	0.0404	0.298004	0.0008	0.0240856	0.4122			0.12307	0.0666	0.324519	0.0012	0.168204	0.0108
0.174892	0.0306	0.210997	0.0324	0.213397	0.0178			0.0505933	0.2642	-0.123249	0.0664	-0.095126	0.1128
0.176699	0.0156	0.17264	0.0182	0.180053	0.0058			-0.105706	0.0744	0.12046	0.0674	0.0546271	0.2028
0.177744	0.0142	0.16253	0.0232	0.251712	0			-0.04	0.0032	0.119773	0.0882	0.26926	0.0002
0.179529	0.0194	0.142027	0.048	0.111813	0.0688			0.0603195	0.1842	0.10452	0.0956	-0.131944	0.0476
0.181593	0.0408	0.239011	0.015	0.0432099	0.3294			0.0349462	0.2828	0.102759	0.166	0.191187	0.0104
0.194536	0.0074	0.197524	0.0106	0.00478998	0.4796			0.0432578	0.29	-0.0813953	0.1916	0.180053	0.0074
0.201515	0.0242	0.268817	0.0066	0.227941	0.0082			0.0164835	0.4382	0.0567998	0.2362	-0.395802	0
0.209659	0.0082	0.270795	0.0046	0.385592	0			-0.0172727	0.4414	0.0400287	0.324	-0.140902	0.0504
0.211435	0.0072	0.174791	0.0194	0.443071	0			0.0136029	0.444	0.046875	0.3358	0.0355527	0.331
0.212687	0.0124	0.141047	0.0456	0.303928	0.0002			-0.0399562	0.2802	-0.0391827	0.3534	-0.0720575	0.1376
0.215659	0.0214	0.272665	0.0048	0.0802469	0.2176			-0.0250829	0.3838	0.027957	0.3656	0.0333963	0.3624
0.215965	0.0038	0.327262	0.0012	0.177797	0.0104			-0.0792279	0.1986	-0.0158654	0.428	-0.0848093	0.163
0.21622	0.0058	0.258115	0.002	0.284078	0			-0.0559115	0.021	-0.015625	0.4342	-0.0980681	0.1152
0.22474	0.0086	0.248634	0.0096	0.217417	0.0192			-0.0979779	0.1502	0.0104198	0.4404	-0.0255979	0.3898
0.230495	0.0142	0.27891	0.0004	0.14	0.0862			-0.064148	0.0838	0.145281	0.0522	0.101125	0.0214
0.23621	0.0038	0.20978	0.0086	0.201313	0.005			0.0269432	0.3698	0.134146	0.044	0.0856378	0.1396
0.243333	0.0058	0.186535	0.0408	0.158856	0.0564			0.0977298	0.163	0.11708	0.1354	0.206791	0.0126
0.246642	0.0264	0.149811	0.0362	0.314078	0.002			0.0416466	0.3136	0.125889	0.156	0.152729	0.0494
0.26455	0.001	0.205386	0.0108	0.306306	0			-0.0310606	0.3678	-0.0582909	0.3	0.00516693	0.476
0.26753	0.0004	0.194026	0.007	0.378543	0
0.279396	0.0022	0.21978	0.02	0.165185	0.0534
0.282309	0.0002	0.232378	0.0002	0.312641	0
0.286437	0.0002	0.148972	0.0418	0.316326	0
0.289727	0.0002	0.173636	0.0204	0.126042	0.053
0.296703	0.0012	0.265797	0.0088	0.348148	0.0008
0.297527	0.001	0.207074	0.027	0.0790123	0.2218
0.303846	0.0018	0.25	0.0114	0.232099	0.0108
0.309341	0.0018	0.222871	0.0214	0.0609877	0.2872
0.31219	0	0.159319	0.04002	0.339708	0
0.315536	0.0002	0.146421	0.0492	0.343942	0
0.317033	0.0012	0.200549	0.033	0.0975309	0.1668
0.328885	0	0.194275	0.0104	0.228973	0.0018
0.335814	0	0.197133	0.0094	0.418358	0
0.347253	0.0002	0.288118	0.0054	0.28716	0.0022
0.363187	0.0002	0.246566	0.0142	0.354321	0.0004
0.368015	0	0.212417	0.0112	0.0180995	0.4236
0.387912	0.0004	0.200549	0.0314	0.180494	0.0364
0.393756	0	0.163027	0.0298	0.299819	0.0002
0.415385	0	0.215316	0.023	0.26963	0.004
0.448381	0	0.149256	0.0448	0.341669	0
0.519071	0	0.203547	0.0264	0.507036	0
0.712224	0	0.183127	0.0278	0.555263	0
0.799873	0	0.148387	0.0498	0.57193	0
-0.0426245	0.2744	0.138654	0.1288	0.0934861	0.0818
0.121569	0.072	0.131356	0.168	0.194689	0.0046
0.236716	0.0026	0.133522	0.0666	0.195083	0.004
0.306149	0	-0.123059	0.07	0.284299	0.0002
-0.0728847	0.103	0.092665	0.0804	-0.0187108	0.3898
0.301374	0.0008	0.151099	0.0834	0.175802	0.0404
0.35206	0	-0.122471	0.0856	0.179164	0.0104
0.529022	0	-0.143581	0.0904	0.188826	0.021
0.0120879	0.4418	0.142857	0.0918	-0.0802469	0.213
0.0350332	0.302	-0.0982545	0.1096	-0.00063012	0.5062
0.223333	0.01	0.121355	0.118	0.177419	0.0316
0.0520153	0.2666	0.101886	0.1208	0.196575	0.0106
0.225284	0.0082	-0.125076	0.1252	0.486691	0
0.382418	0	-0.127747	0.1256	0.213086	0.0182
0.216473	0.0042	0.092842	0.135	-0.0046308	0.469
0.231125	0.0026	0.0955627	0.1372	0.171095	0.0146
0.442539	0	0.0916061	0.138	0.385535	0
-0.425351	0	-0.0870968	0.1382	-0.219967	0.002
0.451025	0	0.0886499	0.1484	0.449348	0
0.0635965	0.22	-0.083014	0.157	0.227795	0.004
0.557007	0	0.104167	0.1618	0.496534	0
0.218681	0.014	0.10989	0.1622	-0.0466667	0.3214
0.216003	0.01	-0.10107	0.1656	0.288805	0.0006
-0.151278	0.0444	0.102004	0.1688	-0.0235653	0.3744
0.23959	0.0012	0.0805257	0.1692	0.187114	0.0092
0.33603	0	0.0821983	0.1696	0.465823	0
-0.103739	0.0864	-0.06467	0.1904	-0.126758	0.029
0.349725	0.0008	0.0858516	0.217	0.171111	0.0408
0.220771	0.0114	0.0822072	0.2208	0.310649	0.0008
0.0755495	0.2384	0.084478	0.2236	0.0128395	0.4634
0.358779	0	-0.0678043	0.228	0.216562	0.0032
0.463443	0	0.0578087	0.2358	0.404123	0
0.327682	0	0.060241	0.2372	0.265892	0.0002
0.237387	0.0016	-0.063576	0.2442	0.0592299	0.2252
0.51762	0	-0.0748874	0.2444	0.435203	0
0.215441	0.003	0.0617788	0.245	0.28287	0.0004
0.326614	0	-0.0585926	0.2558	0.190954	0.0078
0.248229	0.0028	0.0565556	0.256	0.385367	0
0.124179	0.0422	0.0481321	0.258	-0.0233603	0.347
0.377358	0.0002	-0.0700695	0.2604	0.379463	0
0.295879	0.0022	-0.0683379	0.2626	0.0953086	0.1732
0.392367	0	0.0506457	0.2628	0.329769	0
0.31592	0.0006	0.0661599	0.2646	0.511237	0
0.267485	0.0066	-0.0661224	0.2676	0.244231	0.0072
0.326838	0.0002	0.0637019	0.2704	0.0554622	0.2648
0.425275	0	0.0618132	0.2788	0.234568	0.0112
0.141912	0.0574	0.0572115	0.28	0.0223659	0.3988
0.400419	0	-0.0487768	0.2846	0.260962	0.0006
0.307418	0.002	0.0645604	0.2852	0.0728395	0.2142
0.259088	0.0002	-0.0492298	0.2902	-0.0304901	0.3532
0.448	0	0.0398609	0.2972	0.355741	0
0.499176	0	0.0552885	0.3032	0.201481	0.0226
0.208516	0.0246	0.0470467	0.3162	0.224198	0.0138
0.255896	0.0016	-0.0364205	0.3268	0.251712	0
0.151801	0.0354	-0.0359161	0.3282	0.131936	0.0372
0.587065	0	-0.0461712	0.3306	0.606385	0
0.277156	0.0026	0.0464527	0.3334	0.326402	0.0004
0.248285	0.0016	0.0284504	0.3594	0.359679	0
0.244337	0.0002	0.0281959	0.3614	0.195057	0.0054
0.194517	0.029	0.0428389	0.3638	0.271451	0.0062
-0.0237702	0.3736	-0.0265874	0.3674	0.0401795	0.2732
0.001443	0.4952	0.0434783	0.3754	0.277193	0.0034
0.296009	0	0.0258065	0.3776	0.372364	0
0.109991	0.0776	-0.0220944	0.385	0.231936	0.0004
0.278297	0.0044	-0.0305632	0.3852	0.132346	0.0958
0.229666	0.0022	0.0253286	0.3854	0.226635	0.0016
0.336285	0	0.0232459	0.3884	0.27608	0.0002
0.312406	0	-0.0227001	0.3904	0.301167	0
0.0897595	0.1888	-0.0275901	0.4046	0.256879	0.0042
0.339266	0	0.0206691	0.4082	0.257134	0.0004
0.245588	0.0014	0.0180288	0.4194	0.161474	0.0184
0.197735	0.0082	0.0156511	0.426	0.258507	0.0004
0.0595922	0.2022	-0.00959091	0.4332	-0.0328841	0.3268
0.311813	0.0002	0.0120192	0.441	-0.04	0.3466
0.00228257	0.4804	-0.0108696	0.4474	-0.111345	0.0556
0.231655	0.0056	0.00850461	0.4668	0.377789	0
-0.176387	0.0108	-0.00609947	0.4682	-0.116807	0.04
0.493681	0	-0.00755495	0.475	0.23284	0.0096
0.390615	0	-0.00489845	0.4846	0.350495	0
0.304252	0	0	0.4982	0.133659	0.0458

## Sheet: MSI
Response - A3kVhz	Response - stronger uni. (A3k / Vhz)	MSI - A3kVhz	Response - A10kVvt	Response - stronger uni. (A10k / Vvt)	MSI - A10kVvt
0.152986	6.57897	-0.954549	16.5414	17.8094	-0.0369121
4.59356	2.21888	0.34858	19.3371	9.68071	0.332774
0.121834	1.98475	-0.88433	3.90456	5.91919	-0.205078
4.62541	0.667702	0.747709	3.55893	5.08609	-0.176652
2.13012	1.26482	0.25488	5.28446	5.38015	-0.00897263
0.0477855	3.47151	-0.972844	7.57849	4.38542	0.266892
0.256233	2.9747	-0.841388	7.08899	3.80429	0.301534
1.00285	3.45411	-0.549984	10.1733	4.44331	0.39202
4.76816	0.0863573	0.964422	6.62287	6.94729	-0.0239063
0.139338	6.95624	-0.960725	10.1618	8.42661	0.0933485
3.56812	0.0298891	0.983386	5.03149	6.10023	-0.0960082
4.74618	6.07634	-0.122907	3.98102	0.211856	0.898945
1.05297	0.775306	0.15187	9.52601	7.27051	0.134284
1.95078	0.217181	0.799644	6.97982	10.1103	-0.183175
4.21302	3.20178	0.136381	8.25864	4.88345	0.256822
1.34303	4.51006	-0.541086	4.3898	1.85519	0.405862
0.910362	0.687895	0.139193	4.76992	2.51873	0.308861
0.577214	4.6462	-0.778989	17.6402	7.91567	0.38052
4.03806	3.18005	0.118869	11.5364	0.0444789	0.992319
0.617949	0.141802	0.626714	4.72469	5.42112	-0.0686426
3.43064	0.149507	0.91648	16.8055	11.244	0.198275
7.26451	0.239725	0.936109	8.6803	5.07084	0.262484
1.93926	0.00728535	0.992515	9.67053	10.1521	-0.0242938
0.114552	3.4102	-0.935001	14.785	10.7011	0.16024
1.98274	0.105858	0.898633	9.25009	4.84182	0.312822
0.0471528	0.805142	-0.889351	5.16208	2.04195	0.433108
0.726876	0.595028	0.0997406	7.52396	4.96669	0.204734
0.207615	5.08495	-0.921545	7.67506	4.6832	0.242095
0.000174825	1.805	-0.999806	2.96275	2.40888	0.103111
0.871565	1.67279	-0.314902	8.36152	7.07678	0.0832178
5.98159	4.66631	0.123524	0.867147	1.22647	-0.171629
2.08235	0.191269	0.831749	8.95549	11.2076	-0.111694
5.58849	8.45276	-0.20399	3.69958	0.191269	0.901683
0.192396	2.17204	-0.837258	12.8897	9.36151	0.158564
0.303164	4.25236	-0.866903	7.79277	5.25344	0.194641
0.916977	0.811269	0.0611652	0.45883	1.6672	-0.568369
0.0987288	1.37757	-0.866248	8.42694	8.00535	0.0256562
0.0599212	2.39677	-0.951218	6.88022	12.8472	-0.302471
0.000376648	5.77676	-0.99987	15.876	10.912	0.185308
0.029447	0.530129	-0.894752	4.1683	4.44967	-0.0326491
2.43155	1.41013	0.265879	7.81813	8.27893	-0.028626
0.250317	7.01031	-0.931048	19.1305	13.8909	0.158671
0.0992467	2.15117	-0.911797	4.3927	4.77641	-0.0418479
3.06248	2.76985	0.0501736	10.597	7.48151	0.172332
0.178073	3.85597	-0.911715	10.5848	7.70115	0.157697
0.196747	1.87276	-0.809861	12.2185	8.85131	0.159811
0.779982	2.4035	-0.509982	9.54734	9.75772	-0.0108977
0.482302	0.63792	-0.138918	7.88356	5.00375	0.22346
1.01644	0.078164	0.857182	5.17446	2.17227	0.408643
0.354742	1.63397	-0.643245	8.1125	11.1378	-0.157158
2.08318	1.03448	0.336374	6.56873	4.57087	0.179347
6.24666	0.0937908	0.970415	15.1801	13.217	0.0691308
0.309793	2.23415	-0.756447	10.1842	7.47211	0.153605
0.131129	2.45232	-0.898485	7.1451	11.8715	-0.248542
0.953968	0.122451	0.772484	0.178466	3.37366	-0.899516
9.68021	3.57359	0.460745	7.77069	9.1505	-0.0815433
2.70165	0.0178358	0.986883	12.2613	8.67064	0.171539
2.91051	3.28509	-0.0604585	11.3708	10.8394	0.0239225
2.34663	1.35196	0.268932	9.4802	6.63629	0.17646
2.87793	2.03457	0.171676	3.99343	6.29079	-0.223386
0.371066	2.43322	-0.735358	6.85169	11.5162	-0.253949
2.96207	0.211218	0.866878	10.5727	6.64832	0.227883
2.49588	2.28313	0.0445187	8.51947	4.05322	0.355235
1.11052	0.00697406	0.987518	5.79223	4.85518	0.088007
1.76372	0.128699	0.863985	7.4121	8.09052	-0.0437619
4.61176	3.0082	0.210443	10.5244	6.37036	0.245877
1.78218	0.0685403	0.925931	8.4321	6.73486	0.111904
0.168806	1.13004	-0.740068	10.852	7.56489	0.178483
0.592453	1.06023	-0.283039	0.0113612	0.932146	-0.975917
0.366451	1.37872	-0.580039	4.37256	9.09488	-0.350647
2.69144	1.66535	0.235516	11.2926	4.98539	0.387467
2.84124	0.487068	0.707318	11.0021	7.10994	0.214893
11.3669	2.91181	0.592147	13.9612	3.8875	0.564395
10.8696	2.36785	0.642248	17.3703	5.14013	0.543312
2.70742	0.609088	0.632693	4.81063	4.38331	0.0464788
4.18375	3.88127	0.0375061	8.69261	4.86713	0.282121
2.47799	5.29638	-0.362523	2.56258	9.44468	-0.573161
6.81566	6.797	0.00137054	16.6046	12.113	0.156407
15.8791	18.033	-0.0635133	5.30117	7.43687	-0.167663
6.55948	4.30178	0.207867	16.3831	13.4021	0.100081
8.92691	8.81672	0.00621013	44.929	37.7084	0.0873773
0.986028	3.68952	-0.578219	9.95626	6.50847	0.209405
0.0535866	4.82742	-0.978043	17.6612	16.003	0.0492572
2.93591	3.68014	-0.112489	12.0503	10.8333	0.0531801
3.65851	5.24195	-0.177906	5.75405	7.08882	-0.10393
11.9698	12.0759	-0.00441184	11.8186	10.9997	0.0358905
9.97359	10.4946	-0.0254538	15.9058	5.6278	0.477302
2.16484	6.68952	-0.511012	5.05864	3.67051	0.159023
5.98667	5.28039	0.0626856	7.42782	3.75381	0.328575
1.81776	7.20393	-0.597025	18.7183	9.4483	0.329113
0.0236045	0.637637	-0.928606	4.8137	1.56263	0.509866
3.54508	0.0728099	0.95975	6.10605	1.83135	0.538553
5.63083	4.9598	0.0633605	9.16308	6.72401	0.153525
1.30549	1.64124	-0.113939	5.85433	2.95659	0.328881
11.3933	10.8722	0.0234042	18.7668	6.46019	0.487835
1.95416	0.998678	0.323582	5.55601	2.50072	0.379222
6.68418	2.20933	0.503159	9.55917	2.56174	0.577303
13.5837	10.2173	0.141442	12.2203	12.2434	-0.000941249
4.70731	5.87579	-0.11041	18.1951	10.1712	0.282867
5.06108	6.94781	-0.157111	21.3336	18.0417	0.0836041
4.15981	4.51163	-0.0405722	14.7586	8.50146	0.269009
13.583	6.08287	0.381379	11.5581	8.98624	0.125187
8.84883	10.5279	-0.0866546	18.9881	12.023	0.224601
11.5431	4.27247	0.459715	18.8285	9.41333	0.333376
2.36655	4.53722	-0.314419	8.62377	7.19007	0.090661
6.15586	3.42547	0.28497	11.7105	6.53478	0.283674
0.0470672	6.73322	-0.986116	21.3398	15.857	0.1474
0.0698609	1.80433	-0.92545	13.9632	6.44903	0.368122
6.65794	5.34927	0.108991	9.21561	12.1399	-0.136932
6.16687	3.2277	0.312859	14.0765	12.9687	0.0409638
0.371877	3.96904	-0.828664	27.3139	16.4351	0.248663
6.30302	4.16325	0.204445	18.5602	14.2796	0.130349
5.96253	2.52593	0.404856	19.4693	16.0836	0.0952292
2.99775	3.12117	-0.0201711	2.97936	3.86047	-0.128821
4.18307	5.05068	-0.093961	11.1119	12.6177	-0.0634566
2.70132	2.78795	-0.0157829	15.5412	9.39623	0.246414
3.67854	5.38878	-0.188616	12.4766	7.43773	0.253027
3.90067	4.03005	-0.0163134	11.7729	13.4806	-0.0676232
2.34462	3.31618	-0.171629	10.0162	6.8469	0.187941
1.08919	4.04205	-0.575467	7.39859	4.9739	0.195975
8.16332	10.4231	-0.121581	16.1131	13.9552	0.071766
2.27962	4.06099	-0.280945	7.44119	5.81373	0.122782
1.38762	1.59574	-0.069761	5.20836	6.10251	-0.0790524
4.11862	2.95859	0.16391	6.8671	4.6968	0.187679
0.501621	1.98127	-0.595937	8.47759	7.39323	0.0683239
1.75032	1.53498	0.0655447	12.7976	12.2551	0.0216536
2.2128	2.60925	-0.082217	6.11693	7.59756	-0.107961
3.7306	6.1662	-0.2461	9.11613	14.8711	-0.239918
5.15811	6.82822	-0.139335	13.3067	7.48432	0.280043
5.3675	4.02946	0.14239	9.61576	7.31331	0.136006
3.19365	6.5776	-0.346318	6.00039	8.41592	-0.167555
2.8752	2.13334	0.148119	4.2965	10.5357	-0.42065
6.01077	8.1411	-0.150533	26.3952	24.2846	0.0416465
2.40216	4.12024	-0.263413	2.07059	4.85803	-0.402308
2.93366	2.46515	0.0867792	3.78779	1.65288	0.392399
4.34967	9.2455	-0.360115	24.6884	15.245	0.236478
7.16116	8.84143	-0.105	26.4122	15.245	0.268072
7.0037	3.2737	0.362933	0.184468	4.6182	-0.923181
0.189628	4.90031	-0.925489	1.41808	5.98386	-0.616836
0.0303579	4.35422	-0.986152	8.03632	6.18738	0.129991
0.879798	1.46017	-0.248024	8.05881	7.44244	0.0397624
0.860676	7.60369	-0.796635	8.60686	9.18858	-0.0326892
7.69318	8.95704	-0.0759064	18.3062	12.3053	0.196032
9.46864	5.42366	0.271615	29.4895	26.174	0.0595629
1.21592	1.62374	-0.143615	9.16275	9.24181	-0.00429527
0.0631167	2.54083	-0.951522	1.77994	3.69675	-0.349993
7.71941	6.71075	0.0698996	11.42	9.16869	0.109346
4.00245	3.50061	0.0668848	13.736	7.17669	0.313653
2.63832	2.96904	-0.0589803	10.3157	7.5604	0.154132
5.59017	9.69671	-0.268632	22.8897	18.9917	0.0930711
6.76404	4.50364	0.200609	15.849	12.3504	0.124069
5.15262	12.8244	-0.426756	16.008	23.2596	-0.184672
1.01035	2.16672	-0.363973	5.1064	3.4443	0.194382
0.935701	2.00696	-0.364045	5.92175	4.27768	0.161193
5.74567	5.2502	0.04506	29.9536	20.29	0.192336
4.75571	4.54558	0.0225913	5.82215	3.70743	0.221911
7.84613	5.67304	0.160742	13.8143	10.131	0.153822
2.69385	7.40286	-0.466391	9.74977	11.4423	-0.0798672
5.52572	6.98204	-0.116433	12.8502	6.2934	0.342506
0.138603	4.96386	-0.945672	13.6104	8.64173	0.223289
6.87911	10.5093	-0.208771	36.4638	29.5531	0.104682
10.2956	8.73383	0.082073	20.8824	20.0383	0.0206277
8.17149	11.0712	-0.15069	27.9422	28.7226	-0.0137732
6.64533	6.55811	0.00660551	28.1368	22.8812	0.103016
12.7909	12.7419	0.00191559	6.99328	5.56466	0.113762
11.139	10.062	0.0508034	32.8982	27.0929	0.0967695
6.84689	5.80397	0.082439	21.6674	16.4035	0.138266
2.56111	3.47125	-0.150876	14.6757	9.89737	0.194455
1.9069	6.68034	-0.555876	12.0855	7.0137	0.265549
6.8895	6.08499	0.0620074	13.6264	16.9377	-0.108339
7.4715	3.47344	0.365288	15.5487	13.1131	0.0849785
0.216667	1.82115	-0.787354	12.8216	13.11	-0.0111219
8.69015	6.11144	0.174219	12.9537	16.2545	-0.11301
3.28748	6.21579	-0.308138	15.7451	12.0606	0.132507
10.4839	5.64726	0.299832	13.8899	14.9826	-0.0378473
1.6192	3.51213	-0.368897	16.6246	12.2363	0.15205
6.72491	2.67912	0.430219	18.3493	13.1211	0.166131
7.47558	3.76252	0.3304	12.6184	9.7264	0.129426
3.91525	5.0252	-0.124149	14.2277	13.5896	0.0229364
7.54201	0.0485822	0.987199	22.0118	13.955	0.224007
2.32484	3.34187	-0.179474	9.16436	6.72355	0.153627
5.61222	2.73039	0.345436	10.1808	9.55207	0.0318639
5.61234	5.34375	0.024515	12.3347	11.4374	0.0377447
5.93558	0.33753	0.892388	13.7243	13.7162	0.000292695
10.0866	4.84964	0.350622	12.1349	14.0003	-0.0713748
8.5523	2.83139	0.502553	10.9908	10.534	0.0212229
8.00991	5.4092	0.193806	17.8727	19.1999	-0.0358008
9.86934	4.32869	0.390241	13.0394	12.9952	0.00169654
2.00845	3.52723	-0.274362	19.4611	11.1348	0.27214
2.5952	0.237812	0.832114	3.76221	2.84954	0.138037
2.84502	8.65929	-0.505399	7.47614	6.74613	0.0513284
4.78473	5.88992	-0.103534	22.0334	19.9045	0.0507651
4.39198	5.67998	-0.12788	19.3698	14.5307	0.142743
9.61522	5.17477	0.300233	13.1944	12.7542	0.0169659
7.17859	1.28116	0.697116	9.44946	9.35022	0.00527925
7.7786	7.02214	0.0511096	15.9275	9.53577	0.251018
5.7545	6.73002	-0.0781391	14.5696	14.1343	0.0151633
17.4548	7.48663	0.399663	31.9702	33.9272	-0.0296979
10.2656	1.92597	0.684048	30.8139	23.4014	0.136722
4.32419	7.12059	-0.244338	4.30267	2.55303	0.25521
3.9019	6.43398	-0.24498	5.1355	4.46947	0.0693424
6.94895	2.59967	0.455488	11.4873	4.50471	0.436632
7.56783	2.89534	0.446566	2.97753	6.29945	-0.358082
6.88691	1.21071	0.700971	6.72496	8.7636	-0.131622
3.39211	4.53655	-0.144341	17.3979	14.3228	0.0969429
9.36858	5.8005	0.235221	22.8576	22.9085	-0.00111157
4.6651	3.68865	0.116888	11.0732	12.6327	-0.0657836
6.04968	6.10499	-0.00455072	20.2042	24.7884	-0.101887
11.1496	6.50057	0.2634	24.092	21.9632	0.0462227
4.87931	3.70681	0.136557	16.0582	12.2554	0.134311
5.27143	0.150098	0.944629	10.2607	9.41371	0.0430493
9.15567	5.61748	0.239502	12.1224	14.0501	-0.073654
11.9555	5.88907	0.339961	15.1608	18.3395	-0.0948858
9.09899	5.72166	0.22788	5.63875	6.68493	-0.0848918
4.22651	4.19497	0.00374579	16.83	8.72204	0.31731
5.6566	3.65822	0.214537	18.8199	10.4677	0.285179
3.65719	0.647003	0.699362	4.63977	5.15631	-0.0527294
4.33788	3.96292	0.0451712	15.807	14.3662	0.0477532
5.30063	3.31393	0.230622	16.7676	11.3279	0.193616
3.31076	3.33794	-0.00408913	16.9805	12.7096	0.14385
7.36008	5.9425	0.106564	9.77335	12.7053	-0.130431
16.945	14.75	0.0692569	20.0186	13.6115	0.190516
16.849	10.8886	0.214883	14.6957	12.5134	0.0802039
15.0924	9.66513	0.219217	19.5402	18.2895	0.0330614
23.1705	7.40105	0.51582	32.9618	22.2953	0.193034
22.0025	13.6842	0.233092	28.8694	18.5586	0.217399
7.64577	4.11343	0.300389	9.52793	13.7197	-0.180311
14.0583	5.09229	0.468183	12.6856	10.6458	0.0874245
15.7559	15.0138	0.0241197	13.4042	13.7792	-0.0137949
14.0808	7.81324	0.286268	17.5324	10.7181	0.241211
20.2902	14.5741	0.163954	27.528	24.6108	0.0559505
13.7469	4.88859	0.475347	15.546	16.7765	-0.0380707
10.0079	11.8567	-0.0845567	19.3157	12.7577	0.204468
17.9248	15.7287	0.0652554	14.6696	14.0718	0.0207991
9.36302	4.81928	0.320381	11.9967	8.90627	0.147848
15.7327	3.67192	0.621541	25.3329	17.7579	0.175791
10.2711	6.49407	0.225288	7.1263	8.38495	-0.0811447
17.5134	10.4607	0.252114	19.6882	12.3223	0.23011
12.0967	7.49456	0.234908	13.4827	16.079	-0.0878257
15.8013	12.6784	0.109652	10.6798	6.98773	0.208973
15.7492	9.85843	0.23004	22.9355	14.0793	0.239262
10.4469	5.70863	0.293293	24.3806	24.4347	-0.0011077
0.87175	3.96286	-0.639371	9.46679	13.1957	-0.164541
7.40196	5.63857	0.135224	11.9359	7.40637	0.234179
20.6031	11.8695	0.268951	23.0635	16.6074	0.16274
15.0957	15.2182	-0.00404177	20.7955	14.4838	0.178905
1.87031	5.64779	-0.502452	14.2637	16.7181	-0.0792202
14.3756	10.5765	0.152257	18.0042	9.89346	0.290733
15.7701	10.0384	0.222086	10.0481	9.98815	0.00299026
22.5132	15.5023	0.184422	27.5809	20.6944	0.142651
12.3645	6.66007	0.299846	17.3794	11.7183	0.194555
23.2798	12.9176	0.286269	22.5324	17.2213	0.1336
5.50092	0.63227	0.79382	4.89655	7.46074	-0.207504
14.5869	6.85311	0.360716	14.0784	9.17252	0.210998
13.3654	8.88308	0.201467	11.4579	7.58203	0.203563
11.0651	8.173	0.150333	12.5604	11.3131	0.0522456
11.5567	11.8814	-0.0138516	14.9054	20.13	-0.149123
17.7158	5.57169	0.521487	21.2657	23.5854	-0.0517206
6.47993	6.43247	0.00367565	8.90696	12.8821	-0.182437
17.4259	9.37787	0.300259	15.1291	7.97597	0.30959
9.18201	3.77459	0.417349	11.1029	6.74367	0.244262
11.2054	8.40228	0.142961	14.2091	13.0559	0.0422961
8.19541	9.75037	-0.0866479	10.6067	5.3444	0.329901
9.6222	5.64685	0.260354	13.3149	10.0668	0.138916
4.0896	6.31398	-0.213809	12.3307	14.3541	-0.0758237
10.6691	12.1718	-0.0657908	18.1071	13.2735	0.154031
6.50093	9.77777	-0.201296	9.32889	7.66018	0.0982225
8.52109	11.778	-0.160445	11.2626	8.56665	0.135957
9.98388	9.96019	0.0011879	18.2091	15.6961	0.0741172
13.7299	12.4456	0.0490643	10.1919	11.3937	-0.0556746
0.899444	2.46156	-0.464777	4.91543	5.67711	-0.0719069
9.47005	7.80857	0.0961581	23.8582	24.6046	-0.0154001
9.29544	11.1023	-0.0885799	1.72757	5.58077	-0.527234
4.95743	4.87054	0.00884193	11.9874	13.8534	-0.0722094
16.6332	20.7251	-0.10953	24.6791	15.5806	0.225994
7.32779	7.65032	-0.0215336	9.19221	6.32233	0.18498
9.82375	8.32058	0.0828452	14.3616	9.45518	0.206008
5.90268	8.77074	-0.19546	14.6767	16.2905	-0.0521149
6.77936	7.44131	-0.0465484	9.43978	8.18011	0.0714914
19.9267	19.6905	0.00596157	13.555	10.1175	0.14521
6.31733	5.74567	0.0473893	3.7873	1.57112	0.413588
6.51859	2.82676	0.395044	11.7483	8.04046	0.187373
7.34388	6.75386	0.0418519	16.3023	7.88719	0.347882
3.30335	3.4231	-0.0178023	0.185277	3.757	-0.906005
4.8584	6.02332	-0.107053	2.47039	0.278561	0.797333
0.180144	3.05061	-0.888482	0.266993	1.70652	-0.729424
6.86256	7.34002	-0.0336175	22.7835	16.9803	0.145941
0.107944	2.81837	-0.926226	16.2713	11.6076	0.167284
5.58548	4.82219	0.0733389	14.6776	13.668	0.0356176
8.45969	9.85108	-0.075987	25.8439	19.6495	0.13616
4.46061	4.79312	-0.035932	15.8918	15.9676	-0.00237641
9.85633	9.0648	0.0418334	0.1377	1.6377	-0.84488
11.7113	16.3013	-0.163857	6.02703	3.05844	0.32674
8.45064	7.72726	0.0447147	0.217611	0.863129	-0.597293
3.54026	5.11879	-0.182299	0.760658	2.36035	-0.512556
5.41959	6.6108	-0.0990161	19.8863	11.4082	0.270915
5.92981	5.95445	-0.0020733	18.7063	13.7024	0.154401
2.99985	2.70086	0.0524474	11.6963	12.5009	-0.0332515
0.231499	3.74985	-0.883708	10.9154	11.4429	-0.0235927
7.1248	5.33013	0.144093	21.1462	14.3036	0.193021
0.25518	7.22736	-0.931793	6.95016	7.13244	-0.0129435
0.654761	0.437423	0.198995	6.52868	4.52954	0.180783
7.12042	3.51127	0.33947	12.7684	7.88788	0.236272
1.82229	2.74967	-0.20284	11.8902	15.2449	-0.123629
1.52626	5.91724	-0.589909	15.5734	14.8942	0.0222933
4.32817	5.16182	-0.0878455	9.35114	6.39968	0.187384
5.63964	3.25222	0.268495	8.92232	5.90342	0.203626
3.20964	6.53974	-0.341569	13.2247	8.0607	0.242609
3.74	0.714769	0.679099	7.52842	7.75485	-0.0148159
2.79883	3.17516	-0.0629951	11.9101	9.4315	0.11614
11.8473	9.41393	0.114452	24.7642	15.6508	0.225494
0.133098	6.12442	-0.95746	9.80138	7.86866	0.109379
6.26098	6.93705	-0.0512244	15.1101	7.92041	0.312182
1.77534	4.93256	-0.470672	7.87766	8.35022	-0.0291205
10.2071	9.9626	0.0121248	0.0986122	4.9413	-0.960867
1.50052	3.5885	-0.410289	15.6203	17.7775	-0.0645928
2.93837	2.97411	-0.00604458	2.89757	2.92043	-0.00392833
3.68571	4.39488	-0.0877614	18.6884	14.953	0.111037
3.72609	3.55261	0.0238339	13.3647	16.2278	-0.0967499
0.170531	7.20611	-0.953765	9.41142	13.2548	-0.169565
7.1198	3.91329	0.290626	11.7988	15.7822	-0.144424
3.89685	3.78145	0.0150298	6.5977	10.7892	-0.241072
1.16631	2.47949	-0.360191	0.595794	4.41324	-0.762112
5.2609	5.064	0.0190702	6.19237	4.45833	0.162809
6.48321	2.92497	0.378207	8.89795	7.04864	0.115969
0.199735	1.37298	-0.746	0.662058	0.490135	0.149214
1.68357	1.9121	-0.063557	0.0715078	2.08003	-0.933529
2.82761	8.09422	-0.482209	5.01544	4.00332	0.112224
3.33802	3.92188	-0.0804214	0.179971	1.43465	-0.777073
2.81896	3.74327	-0.140853	0.0392245	7.76162	-0.989944
4.48066	5.40958	-0.0939224	6.27576	10.0742	-0.232323
0.00442989	1.0273	-0.991413	4.83715	3.63407	0.14202
0.0306283	3.97666	-0.984714	6.01956	4.23997	0.173457
6.86581	1.7655	0.590909	5.87588	4.0526	0.183642
0.00368088	1.30124	-0.994358	1.02145	2.43643	-0.409204
11.5986	8.03534	0.181485	1.256	3.47776	-0.469344
3.49651	3.82307	-0.0446145	0.566055	0.155796	0.568344
13.247	7.10471	0.301806	5.28622	6.01347	-0.06436
11.3454	6.67024	0.259506	4.76765	2.98666	0.229677
13.6043	8.77621	0.215727	1.2112	7.70513	-0.728319
9.62891	5.16263	0.301949	3.66752	4.80151	-0.133898
14.3306	14.4301	-0.00346208	8.63589	5.99781	0.180274
12.8117	5.09399	0.43102	3.97136	2.05518	0.317957
2.98502	2.55431	0.0777538	0.12388	1.16549	-0.807844
3.69602	4.04383	-0.0449372	0.0618155	4.37666	-0.972146
6.09241	5.43396	0.0571254	3.79052	4.61273	-0.0978452
3.37721	5.14463	-0.207398	6.49909	1.54284	0.6163
1.81914	2.35027	-0.127389	1.51257	4.67702	-0.511254
5.174	2.50469	0.347626	3.3865	3.4086	-0.0032522
5.71487	1.30316	0.628624	1.27237	1.60338	-0.115104
2.34978	5.14856	-0.373253	3.85218	1.33202	0.486122
3.80672	2.42886	0.220967	0.73545	3.03692	-0.610086
0.16382	0.675317	-0.60955	4.22472	3.37707	0.111508
3.94726	4.9018	-0.107869	0.654449	0.0153286	0.954228
20.8361	22.1972	-0.031627	3.60818	0.972743	0.575307
0.107858	8.95977	-0.97621	4.2959	9.06972	-0.357172
0.0381998	3.27307	-0.976927	3.77899	4.34266	-0.0694038
0.677564	0.21338	0.521002	2.10073	4.40095	-0.353788
6.56982	1.32665	0.663989	0.149266	3.72061	-0.922858
-0.897107	13.4401	-1.14305	16.0845	17.8311	-0.0514967
2.43836	2.49092	-0.0106632	7.95216	12.5151	-0.22294
10.1745	4.57477	0.37966	1.09053	5.99275	-0.692084
5.68088	5.812	-0.0114085	6.57356	5.36877	0.100884
4.17789	5.62673	-0.147772	12.1702	13.3848	-0.0475282
1.25042	5.30909	-0.618747	14.244	8.07295	0.27652
3.54376	1.4218	0.427334	4.14249	5.46077	-0.137274
5.04202	5.30008	-0.0249522	7.86603	5.26259	0.198302
3.6843	2.71446	0.151566	6.22922	8.96645	-0.180133
3.77356	4.75128	-0.114691	9.266	11.7687	-0.118979
6.66431	7.15074	-0.0352097	8.98947	10.9395	-0.0978491
0.197768	15.6194	-0.974993	13.0063	7.62372	0.26091
1.73375	5.74867	-0.536581	6.26785	7.55798	-0.0933127
2.04192	4.28939	-0.354978	5.00771	4.5387	0.0491294
5.85251	3.62983	0.234402	9.46873	5.26313	0.285477
4.21706	3.01438	0.166313	6.43077	4.0418	0.228117
2.16981	4.91262	-0.38727	0.107246	4.61909	-0.954618
4.73252	4.16643	0.0636135	0.0028117	2.94519	-0.998092
1.9004	3.6516	-0.315417	1.35534	1.37098	-0.00573448
4.69065	1.49053	0.517721	2.09888	0.714793	0.491915
6.13574	0.229431	0.927911	1.73636	9.12273	-0.680201
1.54273	0.393891	0.593219	0.182825	1.26608	-0.747638
1.38089	0.289474	0.6534	7.06983	8.20487	-0.0743082
36.7054	36.4249	0.00383557	6.42775	11.9342	-0.299885
22.1404	16.766	0.138136	1.14217	0.0932569	0.849029
2.67867	2.68057	-0.000354825	2.30585	5.44687	-0.405151
15.3657	17.0712	-0.0525783	7.68332	2.86249	0.457133
2.40025	2.36662	0.00705497	1.15905	2.94444	-0.43509
13.7086	13.7064	8.16861e-05	5.76017	11.7537	-0.342216
4.19387	4.39412	-0.0233174	0.0660364	4.78335	-0.972765
0.424242	0.584481	-0.158853	0.0317222	0.395418	-0.851467
3.44456	4.7751	-0.161873	3.7847	1.36297	0.470452
3.55362	3.42405	0.0185687	0.0833375	2.68359	-0.939762
4.98224	5.18334	-0.0197827	1.70217	4.05923	-0.409112
10.0031	9.24876	0.0391842	3.59573	7.87696	-0.373167
2.98863	2.73631	0.0440745	4.33884	2.79796	0.215906
6.3367	9.87825	-0.218412	3.69863	2.6122	0.172153
6.10819	7.72061	-0.116599	3.96215	2.21522	0.282794
2.11746	4.70533	-0.379298	0.495555	0.11764	0.616305
2.66763	2.51896	0.0286637	4.07615	2.67896	0.206835
0.201501	1.62633	-0.77952	6.58052	6.31468	0.0206155
0.058756	1.77756	-0.936007	3.28348	5.77995	-0.275444
0.116901	1.66357	-0.868685	4.00849	0.163503	0.921619
3.79578	2.1244	0.282318	4.19846	5.25372	-0.111642
10.2071	9.9626	0.0121248	0.0986122	4.9413	-0.960867
5.91418	4.29201	0.15894	4.11677	2.14219	0.31548
8.41149	7.56754	0.0528158	0.811456	2.28283	-0.475513
13.7408	10.6492	0.126754	8.54529	6.65276	0.124525
5.5108	6.65706	-0.0942046	0.990726	2.69898	-0.462979
5.53702	6.6742	-0.093126	7.48293	4.21461	0.279402
13.5305	14.1267	-0.0215551	8.63782	11.8119	-0.155214
3.39568	4.10991	-0.0951594	3.14958	2.28978	0.158071
13.0682	10.948	0.0882818	10.4376	14.2936	-0.155917
5.52444	5.66152	-0.0122543	0.634664	0.12259	0.676225
0.010306	0.734953	-0.972343	1.1055	1.43074	-0.128237
6.66444	4.57994	0.185382	8.27002	1.51885	0.689678
8.98586	6.06543	0.194031	9.08983	5.3994	0.254702
11.4943	9.30669	0.105167	9.40269	6.67656	0.169544
14.1838	9.7214	0.186669	12.8853	5.65294	0.390132
12.8064	8.07538	0.226563	11.2751	4.67611	0.4137
8.12235	9.3745	-0.0715645	10.5118	4.35496	0.414136
14.0947	7.98847	0.276511	12.4936	7.96258	0.221498
7.36225	8.07257	-0.0460202	5.21672	6.46298	-0.106703
7.90404	3.80672	0.349877	7.76505	5.49967	0.170782
14.5054	13.4268	0.0386155	4.67753	6.04563	-0.127585
12.056	8.328	0.182888	3.6507	3.60893	0.00575409
17.189	11.2492	0.208866	1.33948	3.80754	-0.479511
9.11586	12.0197	-0.13739	1.58626	0.993319	0.229861
0.876958	3.5218	-0.60127	0.0507689	0.364685	-0.755598
17.7529	16.9221	0.023958	5.22169	0.197662	0.927053
17.7529	16.9221	0.023958	5.22169	0.197662	0.927053
5.02997	5.90481	-0.0800051	0.0370873	2.83427	-0.974167
8.40824	7.68892	0.044686	0.0814413	2.55585	-0.938239
9.21391	7.44108	0.106444	0.726229	0.0140508	0.962039
2.87266	2.04395	0.168552	2.7018	2.95869	-0.0453838
3.5377	2.80383	0.115725	4.52628	3.40492	0.141386
4.51577	2.59922	0.269369	0.288029	8.63629	-0.935451
2.92564	7.41807	-0.434315	0.184982	5.97139	-0.939906
8.01917	10.0856	-0.114138	7.3971	6.50472	0.064192
2.021	11.0197	-0.690047	0.0250666	9.51538	-0.994745
5.69034	3.29741	0.266242	3.12096	4.66319	-0.198124
6.96885	5.68957	0.101062	15.6508	12.5643	0.109392
6.37321	3.58568	0.279904	8.91436	5.40512	0.245068
1.89493	2.63991	-0.164278	8.07102	11.3055	-0.16693
3.73643	4.25219	-0.0645611	16.3261	16.9713	-0.0193787
15.8111	14.4589	0.0446702	24.7119	14.1424	0.27203
6.35425	6.44057	-0.00674622	12.1946	11.7763	0.0174525
4.00856	3.94619	0.00784046	9.61103	7.73638	0.108065
4.19511	4.68358	-0.0550161	13.7212	13.5754	0.0053428
5.4908	4.69839	0.0777695	7.09088	8.21387	-0.0733749
3.94135	1.782	0.377289	8.67444	4.32121	0.334976
3.76997	4.21886	-0.0561893	7.73647	7.95336	-0.0138239
5.09849	5.83975	-0.0677678	22.0178	11.9677	0.295717
6.22968	0.0826057	0.973827	11.7758	7.99093	0.191475
3.34258	2.33882	0.176675	5.44062	4.18374	0.130593
3.96043	0.832152	0.652733	6.86837	8.90747	-0.129254
0.400653	0.0978851	0.607311	5.14452	3.06524	0.253269
3.3427	4.57596	-0.155741	10.2948	10.1614	0.00651681
4.74175	2.37576	0.332417	6.78202	8.07784	-0.0872027
10.5958	10.0869	0.0246044	24.1802	15.0733	0.232004
3.66864	2.47074	0.195118	5.42015	5.23244	0.0176211
3.20402	3.74901	-0.0783807	10.8167	8.68492	0.109315
3.01108	4.47248	-0.195282	8.45808	4.44626	0.310889
9.62027	7.96628	0.0940487	22.2646	15.6136	0.175589
13.1915	8.66524	0.207087	14.4118	8.33725	0.267026
3.21195	2.02962	0.225568	8.89202	10.0979	-0.0634996
5.96157	5.48127	0.041974	7.19236	5.00465	0.179365
1.17742	3.04962	-0.442912	3.76379	5.18854	-0.159149
4.10824	3.37831	0.0974996	7.70401	9.02416	-0.0789178
13.5384	10.3014	0.13578	15.7714	9.76324	0.235294
0.157148	4.41029	-0.931188	5.69765	10.0206	-0.275027
3.0402	2.81295	0.0388253	7.72817	4.30443	0.284539
3.27019	3.40014	-0.0194816	2.95241	3.21116	-0.0419819
7.81652	8.71305	-0.054238	6.45663	8.71515	-0.148863
4.27053	6.73652	-0.224037	6.79627	7.51559	-0.0502608
4.41138	4.55313	-0.015813	9.23246	10.7543	-0.0761421
9.48638	7.99242	0.0854727	5.40203	8.29621	-0.211281
1.6056	2.99182	-0.301522	2.34951	4.68952	-0.332433
3.81309	2.56229	0.196192	3.09242	2.73644	0.0610732
5.0968	2.62943	0.31935	5.02813	7.03492	-0.166358
4.74035	3.0222	0.221338	6.679	4.21313	0.22639
6.4558	4.6894	0.15849	6.26251	4.40277	0.174373
5.99644	4.21366	0.174609	6.25556	3.79685	0.24459
5.03919	4.82511	0.0217022	4.11867	6.32748	-0.211448
6.14118	6.56504	-0.0333584	5.22401	5.67936	-0.0417625
7.70399	4.35233	0.278	12.3672	11.7151	0.0270782
5.99644	4.21366	0.174609	6.25556	3.79685	0.24459
5.03919	4.82511	0.0217022	4.11867	6.32748	-0.211448
6.14118	6.56504	-0.0333584	5.22401	5.67936	-0.0417625
7.70399	4.35233	0.278	12.3672	11.7151	0.0270782
6.92254	4.6346	0.197967	8.75182	4.0534	0.366914
5.23922	4.22748	0.106873	6.61326	7.73519	-0.0781912
10.017	6.00781	0.250187	7.4675	6.30245	0.0846077
8.54538	7.69228	0.0525379	6.34382	6.21491	0.0102647
7.64063	3.08258	0.425064	3.49831	4.89953	-0.166854
7.42014	5.32559	0.164333	7.45612	5.70998	0.132624
5.98916	5.36491	0.054981	8.96326	5.59775	0.231132
9.00654	5.42967	0.247771	9.93428	8.1687	0.0975296
9.13864	7.10929	0.124899	7.18809	4.98987	0.180509
10.0523	7.97947	0.114953	8.24872	8.54451	-0.017614
2.95423	2.35964	0.111894	4.7862	4.91929	-0.0137127
0.018474	4.44398	-0.99172	12.4716	3.32338	0.579185
0.868796	2.3295	-0.456714	4.47271	2.16079	0.348523
2.53559	0.621889	0.606084	7.90999	5.44206	0.184835
2.43305	1.81228	0.146226	4.55769	3.32078	0.156998
1.33459	1.768	-0.139696	1.77616	2.50521	-0.170285
0.745773	2.34445	-0.517334	4.06962	1.86111	0.372384
5.45914	0.0865225	0.968796	20.7441	21.6713	-0.0218588
1.64895	1.98016	-0.0912649	17.7329	22.3201	-0.114529
1.05742	1.34773	-0.120703	4.37606	4.53067	-0.0173591
0.0181026	2.42242	-0.985165	6.13968	1.83001	0.540758
0.027686	1.48502	-0.963396	5.46041	5.71601	-0.0228699
0.036589	3.06449	-0.976402	13.0846	9.94847	0.136159
1.70933	0.00422078	0.995074	4.98505	3.07827	0.236475
0.330755	0.454076	-0.157132	5.98381	5.25446	0.0648985
0.0634185	2.53063	-0.951105	6.81678	5.47247	0.109389
0.5323	1.39028	-0.446265	3.17931	2.53539	0.112679
0.204709	2.28887	-0.835811	4.41388	2.10663	0.353845
2.10795	3.17198	-0.201524	6.07294	6.60244	-0.0417743
1.20841	2.52762	-0.353105	16.2666	12.5982	0.127088
0.109126	5.042	-0.95763	8.677	3.06477	0.477972
1.94903	1.86677	0.0215588	2.94589	2.65958	0.051077
0.050584	0.569213	-0.836773	4.58043	2.48199	0.297128
0.0482094	1.81166	-0.948158	8.62207	3.85001	0.38262
0.0358664	2.28901	-0.969146	8.26429	6.15198	0.146523
0.02787	0.857576	-0.937049	4.28393	2.76676	0.215181
0.0196193	1.89126	-0.979466	9.14809	8.06229	0.0630897
0.050713	4.31029	-0.976742	10.9204	6.89139	0.226198
0.0296494	2.39808	-0.975574	4.18246	0.730513	0.702619
5.22567	0.0865225	0.967425	22.3262	20.6334	0.039405
0.860023	0.663005	0.129359	4.58036	3.97423	0.0708535
0.010202	1.85191	-0.989043	8.21673	4.34243	0.308484
2.65402	2.00084	0.140323	3.8014	3.08851	0.103469
7.56986	6.53554	0.073328	9.59921	6.57187	0.187207
0.0294761	4.26822	-0.986283	10.1983	1.83137	0.695526
0.0974505	2.52282	-0.925618	7.20399	7.98902	-0.0516702
0.0193113	1.29861	-0.970694	5.23351	2.77091	0.307655
0.0333383	5.0363	-0.986848	4.28266	3.94705	0.0407812
0.0533919	0.892449	-0.887102	9.96196	8.98384	0.0516273
0.680887	4.89066	-0.755584	6.15197	2.09406	0.492104
2.47444	0.0210101	0.983161	12.9347	10.2381	0.116369
0.0210834	3.64786	-0.988507	6.88748	3.38003	0.341607
1.22493	0.19132	0.729822	6.54665	3.14635	0.350799
0.729643	0.0958369	0.767803	3.71626	3.484	0.0322581
12.4601	15.3733	-0.104667	9.01908	3.54167	0.436074
3.49507	3.5885	-0.0131895	4.29343	2.583	0.248738
3.53249	5.91514	-0.252196	2.72447	1.85797	0.189092
3.00266	3.74129	-0.109525	2.09769	1.53919	0.153566
2.47347	2.88236	-0.0763448	4.13766	1.32238	0.515616
4.16269	3.63586	0.0675545	2.70788	2.27792	0.0862381
3.61552	1.52143	0.407652	2.36038	0.778772	0.503832
2.68122	1.20769	0.378904	2.78807	1.63788	0.259876
11.7003	13.2167	-0.0608601	6.55477	6.91999	-0.0271042
10.9304	9.85692	0.0516416	5.36828	2.16164	0.425852
9.22273	9.47839	-0.013671	4.86189	5.60958	-0.0714029
9.07779	7.72628	0.0804276	1.55552	3.21333	-0.347632
9.22273	9.47839	-0.013671	4.86189	5.60958	-0.0714029
25.6692	23.0737	0.0532483	7.27238	9.76471	-0.146288
9.07779	7.72628	0.0804276	1.55552	3.21333	-0.347632
4.93011	3.99504	0.104769	4.87119	1.30897	0.576396

## Sheet:  modality selectivity
modality selectivity	permutation test	modality selectivity	permutation test
0.0758874	0.2752	0.0996622	0.2284
-0.0331394	0.3704	0.146181	0.047
-0.0321607	0.3368	-0.18189	0.0058
-0.0321607	0.34	-0.18189	0.008
-0.0567901	0.2374	0.0701535	0.1788
-0.0224953	0.3834	0.097472	0.0996
-0.126003	0.0384	-0.0103829	0.462
-0.0697674	0.2872	-0.0464527	0.3738
-0.00681132	0.4566	-0.0736615	0.1642
0.000119775	0.497	0.123312	0.0536
0.000119775	0.4974	0.123312	0.0466
-0.0156004	0.4252	0.0307965	0.347
-0.101979	0.1052	-0.0702179	0.1978
0.0138626	0.4262	-0.115904	0.0774
-0.0343026	0.3698	0.0992399	0.1822
0.0551948	0.3228	0.0476974	0.401
0.0169082	0.4242	0.0192516	0.4292
-0.252214	0.0058	-0.097561	0.1416
0.0910701	0.1798	-0.101333	0.1376
-0.0336022	0.3158	0.0108209	0.448
-0.0890463	0.185	-0.0818524	0.1858
0.0311404	0.4006	0.068935	0.2388
-0.0975566	0.076	-0.187703	0.0046
0.0110193	0.4466	-0.0304904	0.337
0.030303	0.3256	-0.0682303	0.1806
0.0558286	0.212	-0.0824431	0.154
0.0509043	0.2396	-0.0247404	0.3676
-0.0774254	0.2104	0.251022	0.007
0.047695	0.3188	-0.113331	0.0624
0.0828283	0.1666	0.0380112	0.3396
0.00485088	0.458	-0.0122246	0.4332
0.104144	0.0746	0.0528074	0.2412
0.0531201	0.2242	0.121535	0.0478
0.0784215	0.2348	-0.130135	0.069
-0.0142677	0.4296	0.0612637	0.241
-0.235294	0.0106	0.27307	0.004
-0.347794	0.0004	0.156634	0.0542
-0.0685619	0.2112	-0.189991	0.0142
-0.111055	0.1382	0.0748462	0.222
-0.0246372	0.3816	0.0309764	0.3548
0.0374399	0.355	-0.0579289	0.2708
-0.0373099	0.3044	0.167591	0.0106
-0.0761815	0.1484	-0.0298979	0.3474
-0.0305273	0.3462	-0.095922	0.1778
0.0320997	0.3196	-0.0432125	0.2736
0.0477303	0.2518	-0.0151687	0.4162
0.0940371	0.1704	-0.0374486	0.3626
-0.0446161	0.2624	-0.105402	0.069
-0.00182735	0.4882	-0.00607681	0.4606
0.0843814	0.122	-0.0137086	0.4328
-0.0266334	0.3666	-0.0973008	0.0714
0.0764463	0.1578	-0.123134	0.0576
-0.094143	0.088	-0.0205402	0.3794
0.0238453	0.3582	-0.0517506	0.2218
0.0669971	0.1976	0.107268	0.0708
0.0157499	0.4182	0.0729277	0.1858
0.00576923	0.4826	0.17702	0.0188
-0.0477879	0.2934	-0.166271	0.0236
-0.0270227	0.368	0.00132774	0.4952
0.087338	0.1734	0.182425	0.0362
-0.146856	0.032	-0.102806	0.1134
0.0161902	0.4336	-0.241798	0.0054
-0.108049	0.0904	0.0103255	0.4566
0.0766237	0.185	0.0146011	0.4228
-0.0169326	0.4246	0.0900431	0.1198
-0.0394265	0.3484	0.0209592	0.4014
0.0523256	0.279	0.0281115	0.3686
0.0374778	0.3228	0.130752	0.0558
-0.152289	0.0662	-0.291695	0.0006
-0.0165094	0.4222	-0.0545073	0.2336
0.110686	0.1246	0.165657	0.0536
0.0946863	0.1098	0.0881033	0.1258
0.0618804	0.2028	0.0611461	0.2004
0.0135913	0.4242	0.123898	0.055
0.111783	0.091	0.0596693	0.2096
-0.0854424	0.1908	-0.0169082	0.436
0.0933862	0.185	-0.0133333	0.4364
0.136924	0.0558	-0.0102657	0.469
0	0.4968	0.0458937	0.3238
-0.158524	0.0514	0.081643	0.2164
0.100496	0.0904	0.108176	0.0698
-0.0848485	0.221	0.178066	0.0424
0.244658	0.0122	0.117436	0.1192
0.0312846	0.3246	0.101398	0.0822
-0.0419527	0.3614	0.183838	0.0392
-0.0531587	0.2628	0.0485339	0.2928
-0.067705	0.2492	0.0988325	0.146
0.0199946	0.4134	0.201923	0.0046
-0.142049	0.0386	-0.0419753	0.3046
0.0225456	0.4058	0.0178896	0.4
-0.00637255	0.471	-0.0268223	0.3936
0.0393126	0.2928	0.0923092	0.084
-0.0994784	0.1878	0.27673	0.004
-0.073334	0.1722	-0.028844	0.3596
-0.0124467	0.4424	-0.0301042	0.3578
0.154347	0.0306	-0.0199497	0.3834
0.0821256	0.2184	0.16539	0.028
0.0498575	0.3158	0.184762	0.0274
0.14023	0.0344	0.145003	0.0268
-0.117456	0.1052	-0.0787037	0.2084
-0.0686813	0.219	0.124874	0.073
-0.0865052	0.1642	-0.160165	0.033
-0.121312	0.0668	0.125814	0.0632
-0.0382868	0.3412	0.0793076	0.203
-0.0503129	0.2596	-0.00356506	0.4766
0.0248529	0.3656	0.2388	0.006
0.00793651	0.4684	-0.126923	0.105
0.041758	0.2934	0.150281	0.0274
-0.0112481	0.4522	0.0507246	0.2904
0.0527501	0.2754	0.147196	0.0274
0.0865082	0.1392	0.000989555	0.4976
-0.0257435	0.3504	0.0121593	0.4372
0.10933	0.1762	-0.0180952	0.4268
-0.13429	0.1016	0.219625	0.0162
0.00293772	0.4796	0.205515	0.0146
-0.0507075	0.267	0.0466806	0.2756
-0.065005	0.242	0.043357	0.3394
-0.0680995	0.1744	-0.142927	0.0298
0.0274927	0.393	0.0349406	0.3742
0.0964742	0.1558	0.0332126	0.3448
0.158347	0.0614	0.0579821	0.246
-0.0109675	0.44	-0.0334138	0.36
0.147282	0.073	0.123225	0.1048
-0.151684	0.0586	0.323232	0
-0.09375	0.213	0.201499	0.0176
-0.0535799	0.2656	0.00404385	0.4954
-0.0663925	0.2412	0.0672303	0.2436
0.0278332	0.362	-0.0487298	0.28
0.111911	0.0818	0.249158	0.0014
0.0870081	0.142	0.0265097	0.3678
-0.0273815	0.39	0.213883	0.0094
0.17672	0.0448	0.0397436	0.3486
0.136646	0.0496	0.209669	0.0038
0.0842727	0.1992	0.15696	0.0362
-0.0880278	0.134	0.259885	0
0.361823	0.0008	0.159286	0.0618
0.0227796	0.4118	0.0570557	0.2712
0.0123297	0.4612	0.0307971	0.3722
0.114154	0.0812	0.0523904	0.2588
0.0242852	0.3966	0.0613929	0.2568
0.117236	0.0806	0.0841121	0.146
-0.0985646	0.1642	0.20202	0.0242
-0.0647149	0.2158	0.0697674	0.207
0.134774	0.0488	0.246128	0.0012
-0.00932676	0.4598	-0.0518519	0.2312
0.0725806	0.2418	0.092942	0.1904
-0.0474997	0.2728	0.14018	0.04
-0.104412	0.0876	-0.089011	0.1398
-0.0927994	0.212	0.138015	0.1242
-0.0111264	0.4418	0.019697	0.4124
-0.0498209	0.265	0.303134	0.0004
-0.0105532	0.4554	0.227324	0.0006
0.00694671	0.47	0.215313	0.0028
-0.0453685	0.2692	-0.0233433	0.366
0.119442	0.1098	0.122972	0.1004
-0.0547264	0.2928	-0.11876	0.1022
0.0815888	0.2092	-0.0315453	0.3526
-0.071978	0.2722	0.0472656	0.3194
0.0291303	0.3718	0.141136	0.037
-0.030954	0.3362	0.0468357	0.2758
-0.0230735	0.3836	0.0617822	0.2002
0.0407739	0.3092	0.361199	0
-0.0618132	0.2898	0.0464844	0.3082
0.0289835	0.3726	0.00795455	0.4718
-0.00473673	0.4782	-0.0990651	0.0912
0.0313669	0.356	0.0533367	0.2784
-0.120982	0.1114	-0.0365112	0.3586
-0.0705311	0.2048	0.0771028	0.1698
0.0500763	0.2896	0.116595	0.0656
0.0923507	0.1806	0.0354384	0.3624
-0.172706	0.0532	0.160243	0.0562
-0.0213969	0.3966	-0.0164983	0.4218
-0.173427	0.0364	0.255009	0.0062
-0.0256046	0.3848	0.026959	0.3558
0.112449	0.1102	-0.0146453	0.428
0.0983516	0.1958	0.119922	0.0958
0.0240362	0.381	0.116835	0.0784
0.0241398	0.4082	0.0944444	0.1328
0.0653425	0.2088	0.0272286	0.3566
0.0617591	0.2278	-0.0844716	0.136
-0.0762987	0.3144	-0.0134567	0.4504
-0.152605	0.062	0.0194444	0.4424
-0.06955	0.2426	0.0235801	0.4
0.046298	0.3092	0.112626	0.0916
-0.0199765	0.4082	0.205918	0.0206
0.117877	0.138	0.177949	0.0388
0.025641	0.4034	-0.0405128	0.3506
0.112052	0.1208	0.212753	0.0058
-0.0213675	0.4212	0.0971429	0.1692
0.0932237	0.1608	0.0108696	0.451
-0.0131579	0.4378	0.0735981	0.1778
0.0575217	0.1744	0.149719	0.0262
0.0206049	0.3994	-0.0758427	0.1842
0.130251	0.0608	0.0647017	0.207
0.0391304	0.3756	0.236575	0.0238
0.117009	0.0706	-0.0615564	0.211
0.0206471	0.4256	-0.20164	0.0134
0.0673717	0.2348	0.0883655	0.1868
-0.00758653	0.4664	0.0570633	0.2294
-0.0818645	0.1948	-0.00503221	0.4832
0.177572	0.0158	0.0107836	0.4346
-0.0392525	0.3182	-0.0111111	0.445
0.311254	0.0014	0.248974	0.0058
-0.0115653	0.4494	-0.0453854	0.3344
0.0339606	0.3612	-0.0511272	0.303
0.21047	0.0264	0.167179	0.0542
-0.00498575	0.4752	0.172381	0.0362
-0.0136757	0.4238	0.368799	0
0.174501	0.054	0.199048	0.0182
-0.14709	0.0724	-0.0841026	0.201
0.0576923	0.3106	-0.0815385	0.2178
0.0620058	0.2326	0.00404531	0.4786
0.228632	0.0204	-0.0107692	0.4682
0.0442153	0.2964	0.0674874	0.1972
0.213319	0.0256	0.230952	0.009
-0.0126984	0.4412	-0.133846	0.0968
0.0609294	0.2368	0.00116822	0.4912
0.268519	0.0056	0.256429	0.0042
0.0707682	0.2004	0.114802	0.0874
-0.105786	0.1614	0.0466531	0.3132
-0.0945819	0.1282	0.113917	0.0804
-0.0867268	0.149	0.15083	0.0342
0.08456	0.1466	-0.0989899	0.1202
0.111467	0.1516	0.177692	0.0392
-0.0176263	0.4166	-0.0462963	0.3184
-0.119225	0.1228	0.0410302	0.353
0.248219	0.0102	0.0580952	0.2794
0.00818235	0.467	-0.0316937	0.3764
0.178325	0.0366	0.00152555	0.4956
0.169764	0.0712	0.00613358	0.4886
0.122863	0.1292	0.0980952	0.1614
-0.0332736	0.3408	-0.0272727	0.3774
0.0763128	0.1718	0.141526	0.0406
-0.0824079	0.2076	0.0466531	0.3218
-0.0302834	0.3808	0.0571659	0.2734
0.00292227	0.4784	-0.102688	0.1562
-0.0174253	0.4068	0.0581416	0.2368
0.03634	0.3542	0.194444	0.0198
-0.0430866	0.3094	-0.160628	0.0494
0.187678	0.044	0.0507143	0.319
0.0491228	0.3108	0.107071	0.1526
-0.0830629	0.197	0.0748792	0.2188
0.192308	0.0414	0.0984615	0.1672
-0.0690073	0.189	0.192492	0.0108
0.0885491	0.146	-0.0728792	0.1718
0.0391696	0.3494	0.0730676	0.2196
0.0939908	0.1326	0.0643327	0.2262
0.141382	0.1098	0.121282	0.1238
0.0785294	0.1832	-0.0355769	0.332
-0.0807836	0.1666	0.0903762	0.1458
0.134265	0.0678	0.175402	0.041
0.122824	0.062	0.0935814	0.1134
0.128734	0.0604	-0.0372035	0.312
0.00580844	0.467	0.0229152	0.38
0.0405948	0.3002	0.145219	0.0288
0.0702798	0.1916	-0.0709277	0.1808
0.186411	0.0156	0.0735317	0.214
0.0404374	0.3022	-0.0830527	0.1632
0.0501879	0.3056	0.0091954	0.463
0.0489569	0.2836	-0.00745866	0.4652
0.000754077	0.4866	0.0859708	0.1426
0.00469778	0.4712	0.313917	0
-0.00781504	0.452	-0.00691948	0.4666
-0.00467563	0.4856	0.0103955	0.4654
-0.0934225	0.1648	0.0233758	0.408
0.0489011	0.2878	0.0146465	0.4262
-0.0212966	0.402	-0.00841751	0.4582
0.208619	0.0322	0.0799423	0.2218
-0.0594768	0.256	-0.0762452	0.1928
0.13574	0.0274	0.169951	0.0088
0.26746	0.0042	0.232564	0.0104
0.149573	0.0798	0.200476	0.0176
0.00198107	0.498	0.110772	0.0972
-0.0460243	0.321	-0.238728	0.007
0.0235527	0.396	0.0637518	0.2286
0.127406	0.0974	0.09843	0.1518
0.0272229	0.3838	0.0623994	0.253
0.0410053	0.3424	0.0733333	0.2554
-0.0322059	0.3594	0.00253593	0.484
-0.147867	0.0768	-0.0889959	0.1978
0.140671	0.042	-0.0380122	0.324
-0.0852075	0.164	0.13852	0.0562
0.0995025	0.1566	-0.0692432	0.2304
-0.0213675	0.4184	0.210769	0.0212
0.0923399	0.141	-0.0245481	0.3804
-0.0905707	0.1676	0.037037	0.363
-0.0633788	0.2542	-0.0410628	0.331
0.195503	0.0306	-0.0228205	0.4212
0.00939555	0.454	0.0679012	0.2
-0.0247634	0.3786	0.152907	0.0342
0.0461305	0.2628	0.178896	0.0064
0.105471	0.0976	0.0929487	0.12
0.0446841	0.2842	0.215495	0.0048
-0.103741	0.1238	-0.0595842	0.2696
0.143695	0.0726	0.108316	0.1546
-0.0879375	0.149	-0.0350513	0.3362
0.223647	0.022	0.229524	0.0126
-0.129138	0.1234	0.206132	0.0238
-0.0162232	0.4306	0.0621981	0.2674
0.0576471	0.2544	-0.0703297	0.2024
0.220442	0.0214	0.201538	0.0232
-0.481664	0	-0.034689	0.3446
0.0202526	0.4066	0.238945	0.0012
-0.0346136	0.346	-0.0825845	0.1482
0.0227854	0.377	0.322222	0
0.084813	0.113	0.0855935	0.1156
0.0887862	0.148	-0.00961538	0.454
0.00991753	0.4654	0.151291	0.0314
0.0132582	0.435	-0.0474747	0.2874
0.098882	0.1164	0.115025	0.0738
-0.129651	0.0876	0.241345	0.006
-0.0658049	0.2524	0.25	0.0048
-0.00647586	0.4602	-0.00782669	0.4516
0.205311	0.0086	0.00512221	0.47
0.0572344	0.3078	-0.0150391	0.4338
-0.0358974	0.3382	0.133576	0.1086
0.212251	0.0286	0.282308	0.0032
0.0123384	0.4612	0.102254	0.145
0.154558	0.08	0.121026	0.117
0.135328	0.1092	0.118718	0.1236
0.112206	0.093	-0.00700549	0.4574
-0.0052879	0.4742	0.120974	0.1034
-0.0233059	0.3968	0.0732689	0.2154
-0.00685468	0.4572	0.153784	0.0488
-0.0495495	0.3046	0.0211353	0.4026
-0.0842027	0.2118	0.143756	0.0854
-0.0842146	0.1806	-0.0499195	0.2964
0.0242852	0.393	0.135064	0.0792
-0.0126689	0.4546	0.0940482	0.172
0.0862873	0.182	0.148569	0.0736
0.133764	0.0754	0.09219	0.1778
-0.12358	0.093	0.125805	0.0838
0.0677634	0.241	0.0839372	0.18
0.0106112	0.4574	-0.136404	0.0912
0.351019	0.0002	-0.00789474	0.4612
0.307072	0.001	0.0657407	0.288
0.0228938	0.4214	0.0150391	0.4302
0.0897825	0.118	0.0323633	0.343
0.00860106	0.4558	0.0692071	0.227
0.182435	0.0406	-0.0393028	0.3316
-0.0965659	0.1382	-0.0226337	0.412
-0.0844105	0.169	0.0171095	0.4288
-0.0859903	0.2454	0.0720851	0.272
0.018956	0.3968	0.0136364	0.4408
-0.0455882	0.3076	-0.0784024	0.2236
0.0161376	0.4412	-0.112564	0.1416
0.0929487	0.196	0.270769	0.0036
0.129395	0.067	0.196339	0.017
-0.0773567	0.1706	-0.0125701	0.424
-0.0307971	0.3444	-0.141907	0.038
-0.0641325	0.2654	0.100445	0.1992
0.00144118	0.4892	0.206692	0.0082
-0.0312192	0.3372	-0.107517	0.0624
0.108766	0.1774	-0.227344	0.0436
0.0391738	0.362	0.0680952	0.2446
-0.0106248	0.4814	-0.289474	0.0016
0.0118897	0.4566	-0.129528	0.081
-0.0312192	0.3308	-0.107517	0.0606
0.00328283	0.4828	0.0266484	0.3756
-0.0887192	0.1596	0.0442834	0.3154
0.0731132	0.171	0.106359	0.0728
0.140602	0.0184	0.08236	0.109
-0.00620404	0.4698	0.105925	0.157
0.0604396	0.273	0.0462891	0.3072
0.140602	0.0144	0.08236	0.1074
0.0384107	0.3116	0.214105	0.0016
0.034298	0.3114	-0.0488669	0.2276
0.0161878	0.4152	0.101957	0.0802
0.0386839	0.3458	0.109787	0.1392
0.0571041	0.2348	0.106734	0.1002
-0.0515394	0.246	-0.0427376	0.2706
-0.0786697	0.129	0.178836	0.0102
-0.00209888	0.4848	0.175602	0.0368
0.0721806	0.1898	-0.00512221	0.4704
-0.0175824	0.418	0.0391414	0.32
-0.173454	0.0428	0.0339623	0.3812
-0.0196361	0.417	0.173864	0.0214
-0.0415619	0.1766	-0.0432349	0.251
-0.0264103	0.3586	0.0580668	0.215
0.0212912	0.395	0.072096	0.2074
-0.197611	0.017	0.118056	0.132
-0.070628	0.231	-0.0643415	0.2508
-0.0202276	0.3882	0.0839873	0.075
0.122718	0.03	0.0232259	0.3734
0.148102	0.0176	0.127576	0.0404
0.122718	0.0304	0.0232259	0.3632
-0.128614	0.0996	0.0730223	0.2376
-0.0947146	0.1456	0.172143	0.0202
0.0389393	0.298	0.278563	0
-0.010899	0.4382	-0.0154238	0.4206
0.165209	0.0504	0.211442	0.011
0.0679612	0.2068	0.0410774	0.2936
-0.085989	0.162	0.171717	0.0222
-0.0338392	0.3438	-0.142088	0.0456
0.111814	0.1366	-0.0328947	0.359
-0.113984	0.1222	0.102858	0.139
0.0489011	0.2788	-0.0993827	0.1564
-0.060359	0.2128	-0.0124975	0.4416
0.0839329	0.0814	-0.0249027	0.3626
-0.180995	0.038	0.443568	0
0.0102639	0.4328	-0.0524254	0.2126
-0.143891	0.0788	0.0377358	0.3642
-0.0287385	0.3578	-0.143923	0.0374
0.152542	0.0796	-0.0340055	0.3648
-0.00410989	0.4718	0.0919887	0.166
0.0848605	0.109	0.156219	0.0148
-0.153846	0.0684	0.157118	0.0716
-0.0316206	0.3142	-0.0586354	0.2024
0.0141665	0.431	-0.275995	0.0014
-0.0192837	0.3818	0.00575693	0.474
-0.0405854	0.2594	0.043549	0.2394
0.0385989	0.3214	0.0891414	0.1536
-0.106009	0.1694	0.0124744	0.4582
0.0861244	0.212	0.26631	0.0156
0.123584	0.0364	-0.0327443	0.308
0.171046	0.0186	0.161392	0.0276
0.110792	0.0492	0.0944192	0.104
-0.00126486	0.4958	0.0825359	0.1852
0.0391484	0.3244	0.255144	0.0034
0.12414	0.059	0.138159	0.0444
0.0502306	0.2628	0.0534759	0.229
-0.164973	0.026	-0.0102273	0.4626
-0.0346572	0.3654	-0.135338	0.0716
-0.0305882	0.3636	-0.00908707	0.4698
0.105357	0.116	0.112374	0.0968
-0.110095	0.0802	0.00942761	0.462
-0.0377799	0.3432	0.0954112	0.1686
-0.140818	0.0696	0.0515298	0.3048
-0.0128099	0.4784	0.0680905	0.2234
0.0765634	0.229	-0.0725806	0.2408
-0.0338153	0.3638	0.116538	0.1202
-0.0395534	0.341	0.120635	0.1294
-0.0201929	0.3714	0.0863764	0.124
0.0268312	0.3878	0.0764895	0.2076
-0.0294118	0.3526	0.00403029	0.489
0.143973	0.0498	0.103672	0.0602
-0.101511	0.1174	0.1125	0.1016
0.0048962	0.4814	0.19525	0.0202
0.0145588	0.4232	0.165385	0.022
-0.0253394	0.4202	0.163979	0.0558
0.0454412	0.2974	-0.228233	0.012
-0.073362	0.2392	-0.209501	0.012
0.0718945	0.2116	0.0491641	0.289
0.0693496	0.162	-0.102559	0.0738
0.10936	0.0606	0.0234601	0.3616
0.00989726	0.4506	-0.0132435	0.4354
0.0548256	0.2572	0.0499297	0.2762
-0.0300824	0.3704	0.173611	0.0174
0.135182	0.024	0.12559	0.0212
0.1045	0.1724	0.119192	0.1348
0.059298	0.1878	0.00174703	0.4792
-0.177125	0.016	0.13575	0.0596
-0.160286	0.0488	0.0503221	0.2968
0.0274559	0.3656	-0.0304153	0.3576
0.0238185	0.364	0.00850754	0.446
0.0789095	0.1478	0.129001	0.0398
0.0386464	0.3188	-0.0433221	0.3098
-0.0434473	0.3406	-0.0997619	0.1656
0.00365469	0.4774	-0.0893973	0.1336
0.0794258	0.2178	0.141703	0.0922
-0.0726285	0.169	0.106061	0.0876
-0.104902	0.1446	0.152948	0.0628
0.0446571	0.3364	-0.0470418	0.3234
0.0461732	0.2566	0.086425	0.1212
0.0247059	0.3968	0.0137363	0.4392
-0.0784215	0.2198	0.0321258	0.3608
0.0426976	0.2966	0.0969697	0.1208
-0.0556748	0.1694	0.193171	0.0002
0.0496805	0.2748	0.181499	0.0092
0.102454	0.1538	-0.00834403	0.4652
-0.0116176	0.446	-0.00211327	0.4894
0.0607759	0.199	0.0650721	0.1686
-0.0623207	0.2592	-0.0332594	0.3456
0.0343716	0.3174	-0.0421433	0.273
0.0331821	0.3424	-0.0720743	0.1798
-0.0458577	0.3266	-0.121779	0.0978
-0.105582	0.168	0.194228	0.0348
0.0135346	0.4144	0.116773	0.0548
-0.0660821	0.1936	-0.0463524	0.2612
0.0413136	0.3336	0.0857143	0.2054
-0.113419	0.0786	0.0433599	0.2788
-0.039951	0.3484	0.0945946	0.1598
0.182775	0.0402	0.217893	0.0182
0.0793184	0.207	-0.0917874	0.1994
-0.0738347	0.2174	-0.0908816	0.1992
-0.0629901	0.2618	-0.260253	0.0012
0.0327066	0.3698	0.123188	0.0672
-0.090522	0.1392	0.143308	0.0484
-0.0605413	0.2858	0.00666667	0.482
-0.043329	0.355	-0.0968661	0.2164
-0.0152339	0.4118	0.0479742	0.2354
0.0523529	0.2788	-0.05	0.2896
0.0206926	0.4498	0.0789474	0.2342
0.0714286	0.1618	0.184886	0.0032
0.0724083	0.2514	-0.0283422	0.3926
-0.252489	0.0072	0.0756364	0.2402
-0.0303172	0.386	-0.0486143	0.3144
-0.19276	0.0262	0.128988	0.1136
0.0644338	0.2844	-0.0519481	0.2938
-0.256109	0.0072	0.18319	0.0454
0.0973806	0.1754	-0.0292208	0.373
0.0645207	0.229	-0.0847059	0.1486
-0.000988142	0.4958	0.0650071	0.2286
-0.0538425	0.2952	0.15339	0.0638
0.0147167	0.426	-0.00579016	0.4624
0.0147167	0.4252	-0.00579016	0.4628
-0.0855882	0.1734	-0.0921386	0.1844
0.064255	0.252	-0.0195764	0.4316
0.128549	0.0952	0.139572	0.1218
-0.0384615	0.3568	-0.0047619	0.4784
0.233812	0.0136	0.281283	0.0144
-0.282956	0.0014	0.0106346	0.4546
-0.365177	0.0004	-0.227535	0.0026
0.0571718	0.2878	-0.0815106	0.1878
0.0589426	0.2854	-0.216336	0.009
-0.0384615	0.3608	-0.0047619	0.4894
0.125824	0.0732	0.199116	0.008
-0.0322194	0.3358	0.077425	0.1642
0.076567	0.2474	0.0488095	0.313
-0.0574004	0.2732	-0.00995733	0.4614
0.0191502	0.389	0.098832	0.071
-0.0999241	0.1132	-0.0403281	0.2962
-0.0921418	0.191	0.104942	0.1184
0.0732423	0.1364	0.143355	0.0244
-0.0213499	0.3948	-0.0369403	0.3276
0.0527709	0.2332	0.0343416	0.3174
-0.154391	0.0734	-0.04862	0.2958
-0.0225776	0.383	-0.0641791	0.1916
-0.16275	0.044	-0.206522	0.023
-0.0865166	0.1944	-0.190148	0.0176
-0.0347685	0.3542	0.141564	0.075
0.0975369	0.0804	0.0466207	0.251
-0.0957343	0.126	0.0898296	0.1458
0.103814	0.1498	0.0837535	0.2124
-0.173203	0.0392	0.275472	0.002
-0.141484	0.047	0.0919192	0.1326
-0.00206044	0.4898	0.205177	0.006
0.00318979	0.4848	0.101587	0.1536
0.109936	0.0632	-0.0241173	0.3708
0.0638117	0.2234	-0.01387	0.4266
0.082265	0.2176	-0.0190476	0.4146
-0.071881	0.208	0.0798073	0.1968
0.174858	0.0588	-0.0838095	0.207
-0.210035	0.0142	-0.241346	0.0022
0.0432987	0.3264	0.107753	0.0958
0.0313686	0.375	-0.0145249	0.421
-0.0260501	0.37	0.0345245	0.348
-0.064641	0.2094	-0.0677362	0.1894
-0.0321108	0.3296	0.155006	0.0278
-0.261237	0.0024	0.413036	0.0002
0.0246305	0.374	-0.00149745	0.493
0.0730463	0.249	0.232323	0.0122
0.0612637	0.2382	0.292045	0.001
0.11714	0.0476	0.00383795	0.4834
-0.0302198	0.3622	0.0757202	0.2016
-0.0812041	0.2076	-0.226418	0.009
-0.0590112	0.2924	0.170563	0.0534
0.0847578	0.2016	-0.132381	0.0384
0.0847578	0.208	-0.132381	0.0408

## Sheet: observed sum vs. precited 
R10k	Rvt	R10k-vt	predicted sum	Z-score (observed sum)	predicted sum*.83	Z-score (observed sum*.83)
3.68948	2.40849	4.71324	6.10275	-0.730699	5.04754	-0.216223
5.02639	4.60963	12.1771	9.57421	1.17437	8.00742	2.3561
8.31439	6.71025	10.0871	14.9176	-0.783276	12.6874	-0.505513
4.87811	3.55997	18.2015	8.44209	3.20675	7.03259	4.35062
13.1985	9.35008	16.6233	22.5968	-1.62574	18.7289	-0.687024
6.41129	4.81459	9.71049	11.2644	-0.676266	9.36832	0.179014
15.9441	3.1878	17.808	19.149	-0.580577	15.8203	0.998443
10.6944	9.0198	10.2351	19.6507	-2.74154	16.3279	-2.06863
8.7486	5.21149	13.6774	13.9313	-0.119488	11.559	1.19609
7.32043	2.79356	18.1427	10.1874	2.57842	8.39905	3.74795
7.1647	3.29756	12.9128	10.4763	0.888067	8.67289	1.8305
11.9841	3.70265	15.8286	15.6921	0.0407916	12.9428	1.05783
8.4873	5.48822	14.2885	14.0498	0.0652063	11.5259	0.870331
6.07639	1.75032	14.8152	7.8142	2.24007	6.4553	3.24012
29.3329	3.18603	37.519	32.4161	1.27583	26.935	3.15489
15.3602	5.01473	20.4341	20.4708	-0.0108055	16.9047	1.21144
26.8578	4.66751	34.1088	31.5512	0.532579	26.1703	2.02272
16.2518	5.20623	23.5372	21.3537	0.828778	17.8003	2.63665
9.27574	2.11595	16.4797	11.3749	2.0731	9.51877	3.35184
7.31446	1.92235	15.0388	9.31233	1.96832	7.69566	3.1599
13.8524	7.83302	17.3346	21.6693	-1.47728	18.002	-0.286351
14.5395	4.42656	9.7332	19.0807	-2.48008	15.8407	-1.95423
7.32043	5.26463	14.0045	12.5588	0.44183	10.5255	1.25764
20.1066	4.81692	30.725	25.0177	1.82813	20.6673	3.7917
9.76712	3.35385	13.1657	13.2233	-0.0141354	10.6797	0.735819
6.07639	4.43603	12.6614	10.5002	0.688214	8.68327	1.49884
22.6999	11.3947	26.4204	34.0378	-2.26854	28.3482	-0.691206
16.2518	8.72738	20.0933	24.8526	-1.4819	20.7299	-0.239151
16.5564	3.92424	13.6987	20.5111	-2.10502	16.8991	-1.14697
12.7501	4.4792	17.909	17.2957	0.187267	14.2908	1.35027
14.7043	6.79976	13.233	21.5038	-2.3082	17.7536	-1.48901
12.9051	1.75274	18.8764	14.63	1.67328	12.1034	3.25618
9.61077	6.32412	13.0596	16.0548	-1.1078	13.1507	-0.0403807
13.2432	6.5817	13.3338	19.8122	-2.01042	16.4501	-1.14217
12.4483	9.79174	22.7457	22.4188	0.0785874	18.5006	1.19194
6.59475	4.31291	8.66962	10.9589	-1.09596	9.03969	-0.216066
9.24534	6.14468	9.7378	15.384	-1.85625	12.827	-1.2024
13.7757	8.91117	12.7466	22.689	-3.44609	18.7922	-2.52262
10.3186	6.2041	9.08737	16.4072	-2.09312	13.7289	-1.62612
12.7323	4.57071	11.6806	17.2672	-1.39318	14.5157	-0.880754
6.26152	3.46117	7.66469	9.85172	-0.45752	8.01269	-0.0853485
19.4364	3.67914	21.218	23.1343	-0.467928	19.1679	0.620815
9.2043	7.80452	10.4007	17.0845	-2.45628	14.1846	-1.68867
13.819	4.97059	14.4383	18.8142	-1.54315	15.6241	-0.508223
22.9815	9.2448	32.3671	32.1973	0.0419107	26.8275	1.55426
5.90861	7.51842	3.62126	13.4172	-3.34084	11.1879	-3.1948
8.61961	5.81967	6.77051	14.4662	-3.05758	12.0385	-2.53852
14.0103	8.99436	18.2049	23.1227	-1.65194	19.0802	-0.345559
22.5767	7.73916	21.6877	30.3672	-2.4282	25.1493	-1.15799
12.4483	7.78491	11.32	20.1046	-3.05575	16.7525	-2.30539
24.5119	4.1634	18.8011	28.6549	-2.9226	23.7531	-1.71026
21.5581	3.16191	24.3692	24.7718	-0.101954	20.6676	1.12824
12.1384	4.29381	15.7223	16.4026	-0.315246	13.6071	1.21068
18.0823	6.46791	17.0724	24.6275	-2.19324	20.4449	-1.14032
5.21756	5.68598	5.44062	10.8466	-2.83299	8.99881	-2.33892
8.50209	7.8984	15.6816	16.5192	-0.251854	13.6024	0.733627
9.18196	10.3244	19.0015	19.507	-0.157032	16.1161	1.03146
11.0557	7.0719	15.2082	18.0665	-0.86039	15.1024	0.0392156
12.5452	8.62599	9.60135	21.1924	-3.92367	17.5703	-3.25843
13.2663	5.0257	19.6576	18.2799	0.382335	15.2621	1.45282
12.4004	8.98449	14.5707	21.4184	-2.07988	17.7992	-1.18546
17.7914	9.59551	19.0152	27.5531	-1.57689	23.0553	-0.935915
21.8337	14.5265	32.4431	36.3252	-0.723859	30.2464	0.507682
18.3615	12.0157	28.6781	30.4164	-0.58911	25.1927	1.42029
13.3207	5.96907	9.12626	19.2439	-2.54008	16.0272	-2.09398
10.4473	5.11183	12.4886	15.6514	-0.748783	12.8735	-0.111517
9.63724	13.3626	13.0172	22.9724	-2.43118	19.1962	-1.83169
10.4594	8.52679	17.3027	19.0241	-0.515077	15.6602	0.584261
24.157	10.1006	27.066	34.1728	-1.50049	28.3075	-0.321613
16.3063	10.0433	15.065	26.1722	-2.43165	21.8414	-1.766
8.88695	12.3782	18.9694	21.1656	-0.479975	17.6374	0.365494
8.80002	6.18957	11.8744	15.0117	-0.943857	12.4002	-0.19051
17.331	7.89457	24.8909	25.0713	-0.0438124	20.8969	1.16549
12.0387	11.4205	19.4246	23.3739	-0.91605	19.5108	-0.0242067
15.6901	11.9855	13.0734	27.7745	-3.4298	23.0925	-2.83983
13.8879	9.18696	22.7481	23.0863	-0.10428	19.1326	1.32282
23.9476	11.8065	23.8596	35.8638	-2.47019	29.5364	-1.45135
5.89938	7.3336	11.8606	13.2329	-0.624483	10.9626	0.52684
16.318	7.96492	22.7455	24.4486	-0.468555	20.12	0.861437
13.0434	14.0981	20.4165	27.1568	-1.56031	22.4181	-0.554208
16.4219	9.87193	13.9684	26.3343	-2.90409	21.8219	-2.25977
9.63432	4.40341	17.7576	13.8694	1.06082	11.6944	1.96269
5.88675	9.79753	9.8734	15.5909	-1.77959	13.0457	-1.15701
20.4011	13.0528	27.2936	33.4406	-1.44639	27.5444	-0.0695733
11.6385	10.6647	17.2761	22.308	-1.80301	18.4209	-0.492291
10.9552	16.9544	22.3111	27.9258	-1.42812	23.2325	-0.277246
9.07877	8.68597	13.9758	17.7685	-1.3743	14.8212	-0.368957
7.17852	7.48918	11.3859	14.6371	-1.48278	12.1608	-0.440449
11.2175	5.50731	12.4424	16.7528	-1.50237	13.8446	-0.602709
19.731	10.4054	14.4751	30.1421	-3.4583	25.0077	-2.90264
4.42939	7.5974	14.7717	11.9397	0.723525	10.0076	1.46115
8.12986	12.8197	13.9744	20.8619	-2.09422	17.5196	-1.33109
5.22642	5.05843	10.5053	10.2353	0.130485	8.52097	1.13263
13.0785	7.58398	17.934	20.7039	-0.905303	17.1918	0.289244
6.18517	7.41367	9.08487	13.6027	-1.49419	11.3199	-0.925442
6.86925	8.23438	10.9305	15.1538	-1.13435	12.5352	-0.535417
15.4534	6.63789	17.9716	22.104	-1.29467	18.2382	-0.100981
7.19867	11.1742	9.95553	18.2781	-2.78749	15.2208	-2.06372
15.2542	11.0518	24.3772	26.3435	-0.522982	21.9044	0.791939
4.57156	6.30315	9.16639	10.8779	-0.987421	8.98304	0.124346
9.28243	8.03265	14.2084	17.2869	-0.970276	14.2881	-0.0311693
16.0768	7.52026	14.4623	23.6428	-2.93833	19.6042	-2.01373
7.98746	8.06936	9.30446	15.9834	-2.62699	13.3095	-1.88926
7.27443	10.0655	13.489	17.3506	-1.96698	14.3819	-0.538439
5.63917	7.87907	11.5506	13.4949	-0.747789	11.203	0.163252
6.87879	7.77413	16.1866	14.6277	0.672049	12.1735	2.08036
16.8662	9.80191	22.6921	26.6626	-1.61822	22.1143	0.289981
11.2031	4.53676	15.8662	15.7388	0.0478866	13.1458	1.21431
13.415	6.27497	14.4312	19.6887	-1.92953	16.3747	-0.844202
19.2823	6.73429	25.4989	25.9633	-0.13199	21.614	1.33367
11.2604	9.33782	19.7388	20.5241	-0.346503	17.13	1.35862
13.4043	8.29461	18.4099	21.8155	-1.04418	17.9176	0.183657
10.9801	4.08474	10.476	15.0896	-1.74639	12.4958	-0.925955
14.0275	6.73962	20.8795	20.6559	0.0773374	17.2157	1.52299
5.89955	7.78844	12.6469	13.6829	-0.510428	11.3905	0.774448
7.84736	5.2413	13.0285	13.1116	-0.0311735	10.8884	0.974654
15.4722	7.44781	24.6011	22.8266	0.728439	19.0006	2.77743
6.26235	7.87458	15.0546	14.1214	0.597172	11.7603	2.50203
14.7447	5.62598	18.4897	20.3743	-0.680597	16.8686	0.716142
15.9994	4.70847	13.1369	20.6456	-2.70811	17.2342	-1.85159
11.177	4.81061	7.32859	16.0817	-2.95335	13.1825	-2.34133
15.4405	5.97475	11.4491	21.3911	-2.7479	17.7559	-2.18972
13.1026	7.40519	11.8878	20.597	-2.52064	17.078	-1.83181
6.61463	3.24428	11.9816	9.80379	0.551704	8.29035	1.09772
7.19019	7.38298	6.09544	14.7404	-1.93448	12.147	-1.58058
3.66261	4.70005	4.68466	8.38271	-1.64887	7.01893	-1.19921
7.23648	3.955	3.40532	11.2211	-2.41416	9.17495	-2.16973
5.43699	3.4994	12.6721	8.83206	1.40283	7.37938	2.31123
7.68639	3.39345	12.2315	11.1171	0.44286	9.16084	1.48246
12.2661	10.2266	15.3386	22.4409	-2.10565	18.6761	-1.19382
16.8482	6.46855	16.1977	23.4081	-3.35854	19.298	-1.73346
11.8449	13.9415	24.4877	25.8002	-0.560698	21.4176	1.59289
4.70793	7.56674	9.43603	12.2649	-1.32487	10.2185	-0.44352
4.00538	4.02597	8.36981	8.02501	0.151519	6.65261	0.922219
11.5842	8.4617	21.6356	19.9982	0.5574	16.6877	2.14339
7.72513	4.13991	11.5009	11.8199	-0.126899	9.8532	0.829078
5.51124	7.96266	6.64646	13.4311	-3.99681	11.2343	-3.21268
7.05927	8.49206	10.6003	15.5698	-2.25422	12.9122	-1.25955
15.3719	9.59025	22.0202	25.0074	-1.05779	20.744	0.521983
7.92286	6.45713	13.9981	14.3216	-0.117297	11.8593	0.915445
4.96465	3.39307	7.14841	8.29475	-0.80243	6.93544	0.185563
9.53378	9.59305	15.6011	19.1925	-1.43878	15.8402	-0.118368
3.17424	4.28904	7.70757	7.47364	0.199115	6.21108	1.52804
5.7298	8.43823	6.15745	14.0561	-2.84967	11.8126	-2.42797
3.69268	3.24624	6.15383	6.92957	-0.525301	5.74839	0.328417
6.01451	4.25197	6.14288	10.2306	-1.99911	8.54823	-1.40244
5.52148	4.01336	7.2786	9.54898	-1.18541	7.91177	-0.391447
4.89151	4.13284	4.75176	9.01417	-2.30169	7.45701	-1.73568
22.2086	3.00155	17.6212	25.0969	-2.38673	20.8373	-1.25246
6.47306	4.73588	9.50891	11.2965	-0.762423	9.32891	0.0946689

[truncated: 4 more sheets: choice on MI, matched vs. unmatched MSI, data for free choice data, Sheet12]
